# Supplementary material
Source: PubMed Central journal article supplement (PMC5210764)
Supplement: supp_pp.16.01655_PP2016-01655DR1_Supplemental_Material.pdf [file supp_pp.16.01655_PP2016-01655DR1_Supplemental_Material.pdf]

## SUPPLEMENTAL INFORMATION

### Chemistry

#### Experiment Procedures

**General:** Unless otherwise noted, all reactants or reagents including dry solvents were obtained from commercial suppliers and used as received. Unless otherwise noted, all reactions were performed with dry solvents under an atmosphere of nitrogen in dried glassware using standard vacuum-line techniques. All work-up and purification procedures were carried out with reagent-grade solvents in air. Analytical thin-layer chromatography (TLC) was performed using E. Merck silica gel 60 F<sub>254</sub> precoated plates (0.25 mm). The developed chromatogram was analyzed by UV lamp (254 nm). Flash column chromatography was performed with E. Merck silica gel 60 (230–400 mesh). Preparative thin-layer chromatography (PTLC) was performed using Wako gel B5-F silica coated plates (0.75 mm) prepared in our laboratory. A reverse phase thin-layer chromatography (TLC) was performed using E. Merck silica gel 60 RP-18 F<sub>254</sub>S precoated plates (0.25 mm). The high-resolution mass (HRMS) spectra were conducted on Thermo Fisher Scientific Exactive. Nuclear magnetic resonance (NMR) spectra were recorded on a JEOL JNM-ECA-400 (<sup>1</sup>H 400 MHz, <sup>13</sup>C 100 MHz) and JEOL JMN-ECA-600II with Ultra COOL™ probe (<sup>1</sup>H 600 MHz, <sup>13</sup>C 150 MHz) spectrometer. Chemical shifts for <sup>1</sup>H NMR are expressed in parts per million (ppm) relative to tetramethylsilane (δ 0.00 ppm). Chemical shift for <sup>13</sup>C NMR are expressed in ppm relative to CDCl<sub>3</sub> (δ 77.0 ppm). Data are reported as follows: chemical shift, multiplicity (s = singlet, d = doublet, dd = doublet of doublets, t = triplet, m = multiplet, br = broad signal), coupling constant (Hz), and integration.

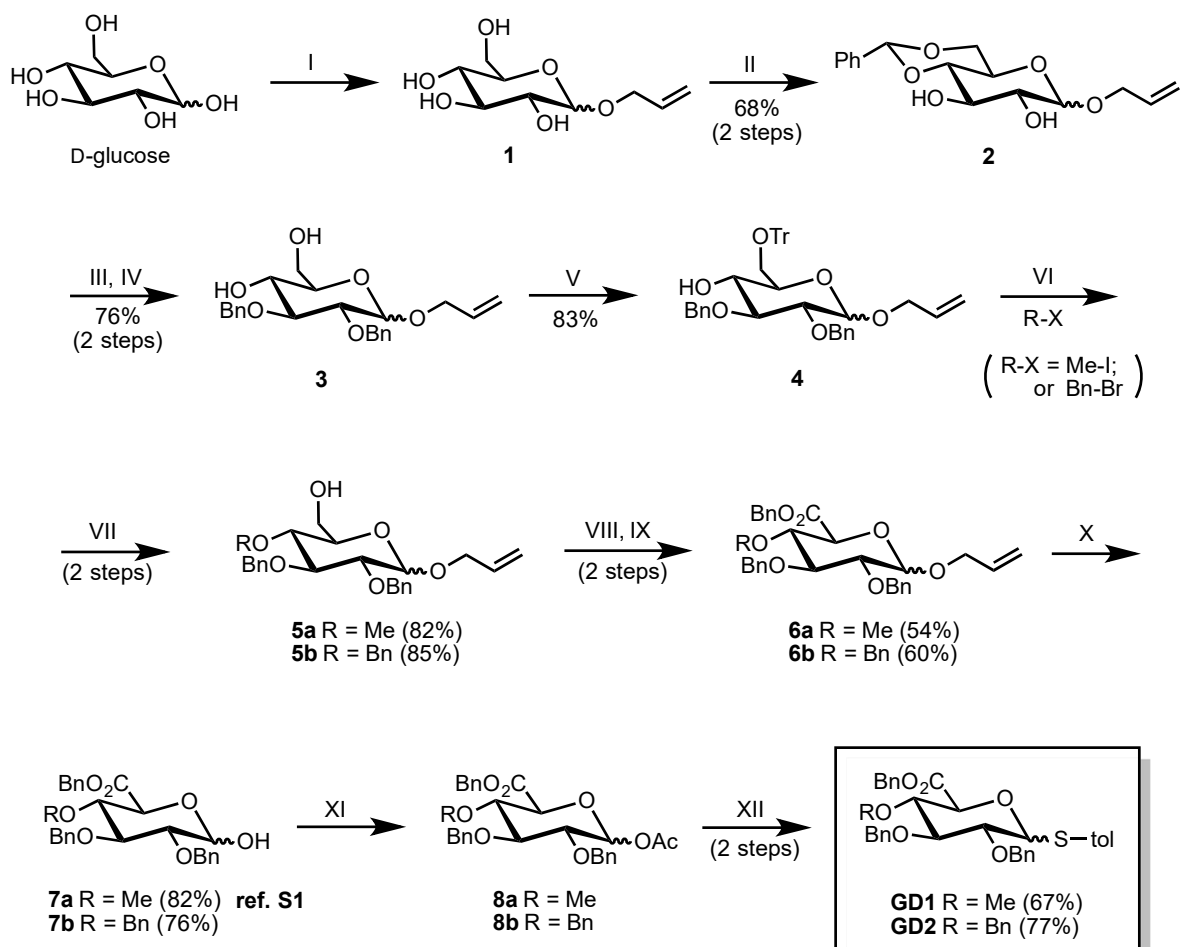

**Fig S1.** Synthesis of glycosyl donors **GD1** and **GD2**

Reagents and reaction conditions: I) acetyl chloride, allyl alcohol, 70°C, 10 h; II) TsOH $\oplus$ H<sub>2</sub>O, benzaldehyde dimethyl acetal, 50°C, 3 h; III) NaH, benzyl bromide (BnBr), DMF, 0°C then room temperature (RT), overnight; IV) TsOH $\oplus$ H<sub>2</sub>O, MeOH, CH<sub>2</sub>Cl<sub>2</sub>, RT; V) TrCl, DMAP, pyridine, 50°C, overnight; VI) NaH, R-X (methyl iodide or BnBr), DMF, 0°C then RT, overnight; VII) TsOH $\oplus$ H<sub>2</sub>O, MeOH, CH<sub>2</sub>Cl<sub>2</sub>, RT; VIII) AZADO, (diacetoxyiodo)benzene, buffer, CH<sub>2</sub>Cl<sub>2</sub>, 0°C, 3 h; IX) KHCO<sub>3</sub>, BnBr, tetrabutylammonium iodide (TBAI), DMF, RT, 4 h; X) PdCl<sub>2</sub>, sodium acetate, H<sub>2</sub>O, acetic acid, RT, 48 h; XI) Ac<sub>2</sub>O, Et<sub>3</sub>N, CH<sub>2</sub>Cl<sub>2</sub>, RT, 4 h; XII) 4-MeC<sub>6</sub>H<sub>4</sub>-SH (tol-SH), BF<sub>3</sub> $\oplus$ Et<sub>2</sub>O, CH<sub>2</sub>Cl<sub>2</sub>, 0°C to RT, 3 h.

38 Ts = tosyl, DMF = N,N-dimethylformamide, Tr = triphenylmethyl, DMAP =  
 39 N,N-dimethyl-4-aminopyridine, AZADO = 2-aza-adamantane N-oxyl.

40

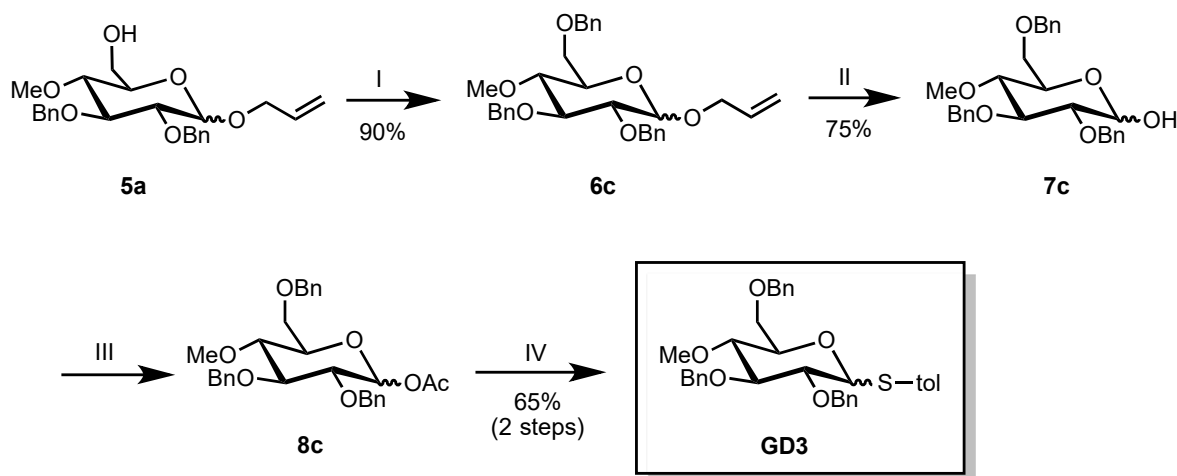

41

42 **Fig S2. Synthesis of glycosyl donor **GD3****

43 Reagents and reaction conditions: I) NaH, BnBr, DMF, 0°C then RT, overnight; II)  
 44 PdCl<sub>2</sub>, sodium acetate, H<sub>2</sub>O, acetic acid, RT, 48 h; III) Ac<sub>2</sub>O, Et<sub>3</sub>N, CH<sub>2</sub>Cl<sub>2</sub>, RT, 4 h;  
 45 IV) 4-MeC<sub>6</sub>H<sub>4</sub>-SH (tol-SH), BF<sub>3</sub>⊕Et<sub>2</sub>O, CH<sub>2</sub>Cl<sub>2</sub>, 0°C to RT, 3 h.

46

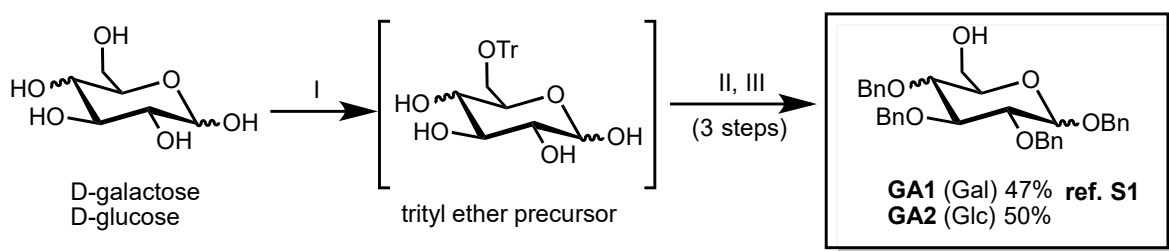

47

48 **Fig S3. Synthesis of glycosyl acceptor **GA1** and **GA2****

49 Reagent and reaction conditions: I) TrCl, pyridine, 50°C, overnight; II) BnBr, NaH,  
 50 DMF, 0°C then RT, 8 h; III) TsOH⊕H<sub>2</sub>O, MeOH, CH<sub>2</sub>Cl<sub>2</sub>, RT.

51

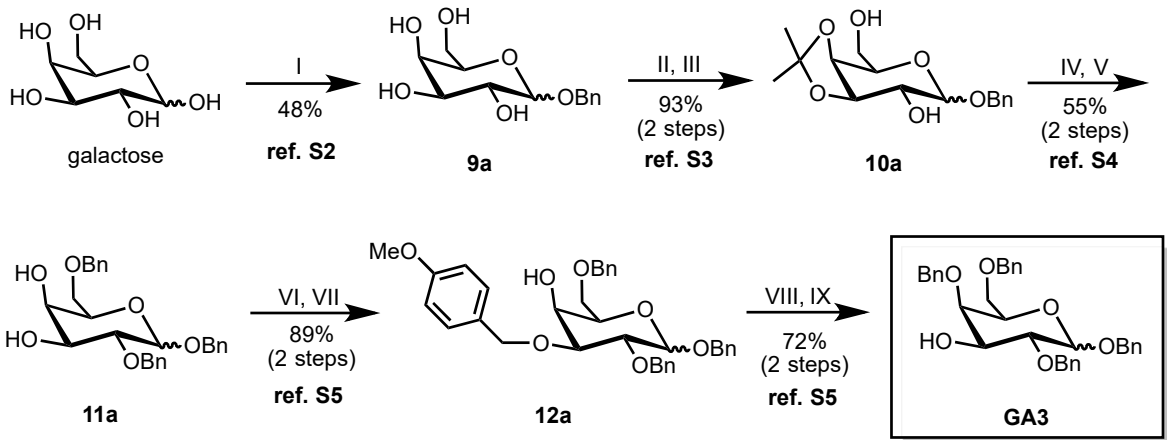

**Fig S4.** Synthesis of glycosyl acceptor **GA3**

Reagents and reaction conditions: I) BnBr, NaH, DMF, 0°C then RT, 3 h; II) (±)-CSA, acetone dimethylacetal, RT, overnight; III) MeOH, H<sub>2</sub>O, reflux, 48 h; IV) BnBr, NaH, DMF, 0°C then RT, overnight; V) HOAc, H<sub>2</sub>O, 65°C, 2 h; VI) Bu<sub>2</sub>SnO, MeOH, reflux, overnight; VII) PMB-Cl, TBAB, MS4Å, benzene, reflux, 6 h; VIII) BnBr, NaH, DMF, 0°C then RT, overnight; IX) DDQ, CH<sub>2</sub>Cl<sub>2</sub>, H<sub>2</sub>O, RT, 1 h.

CSA = camphorsulfonic acid, TBAB = tetrabutylammonium bromide, PMB-Cl = *para*-methoxy benzyl chloride, MS = molecular sieves, DDQ = 2,3-dichloro-5,6-dicyano-1,4-benzoquinone.

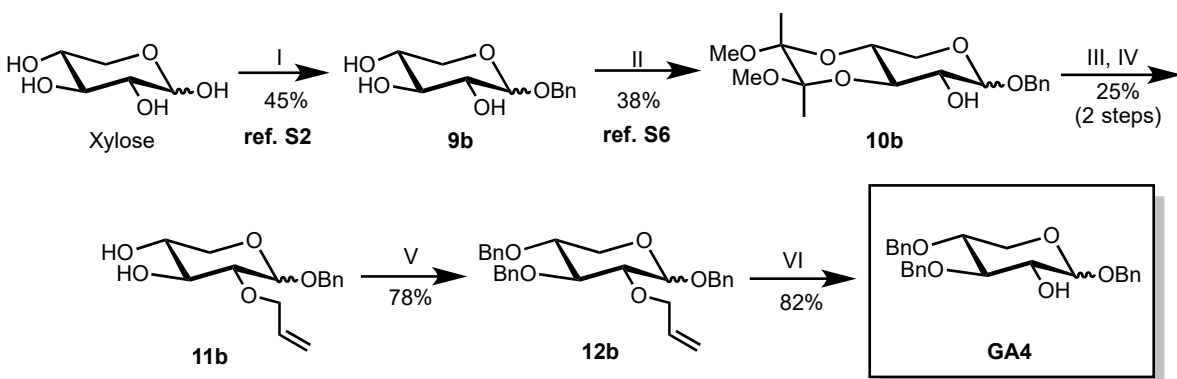

**Fig S5.** Synthesis of glycosyl acceptor **GA4**

Reagents and reaction conditions: I) BnBr, NaH, DMF, 0°C then RT, 3 h; II) 2,3-butanedione, trimethyl orthoformate, (±)-CSA, MeOH, reflux, 20 h; III) allyl

67 bromide, NaH, DMF, 0°C then RT, 3 h; IV) TFA, CH<sub>2</sub>Cl<sub>2</sub>, RT, 15 min; V) BnBr, NaH,  
 68 DMF, 0°C then RT, overnight; VI) PdCl<sub>2</sub>, sodium acetate, H<sub>2</sub>O, acetic acid, RT, 48 h.  
 69 TFA = trifluoroacetic acid

70

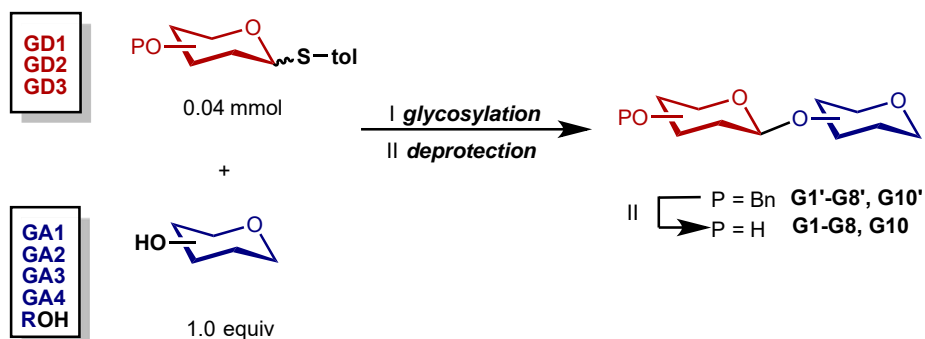

71

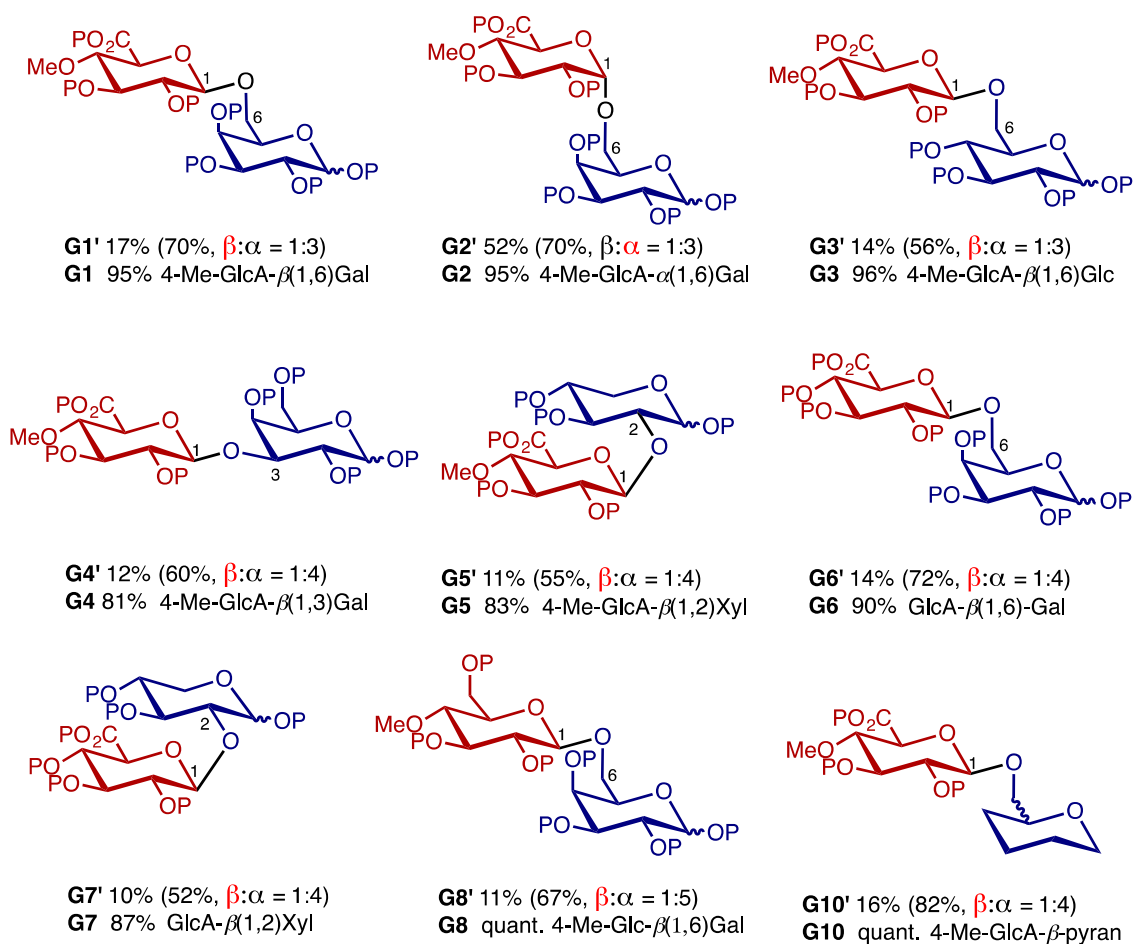

72

**Fig S6.** Programmable glycosylation of glycosyl donor and acceptor, the yields of glycosylation product **G'** and the deprotection product **G** (the total yield of two anomers and ratio of  $\beta$ : $\alpha$  is shown in parenthesis)  
 Reagent and reaction conditions: I) NIS, TfOH (cat.), CH<sub>2</sub>Cl<sub>2</sub>, -40 °C then RT, 4 h;  
 II) Pd(OH)<sub>2</sub>/C, H<sub>2</sub> atm., EtOAc, MeOH, RT, overnight.

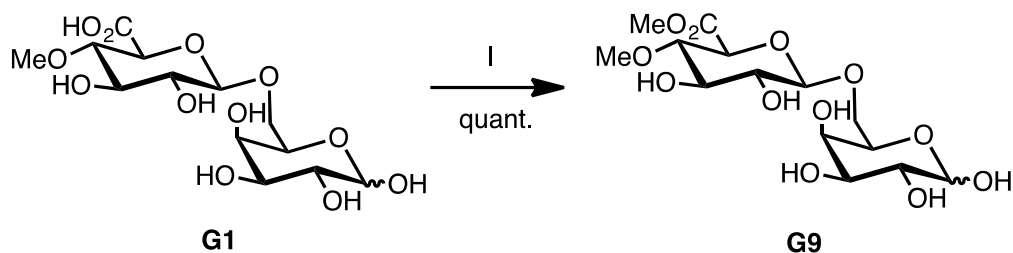

**Fig S7.** Synthesis of 4,6-Me-GlcA- $\beta$ (1,6)-Gal (**G9**)

Reagents and reaction conditions: I) TMSCHN<sub>2</sub>, MeOH, toluene, RT, 30 min  
 TMSCHN<sub>2</sub> = trimethylsilyldiazomethane

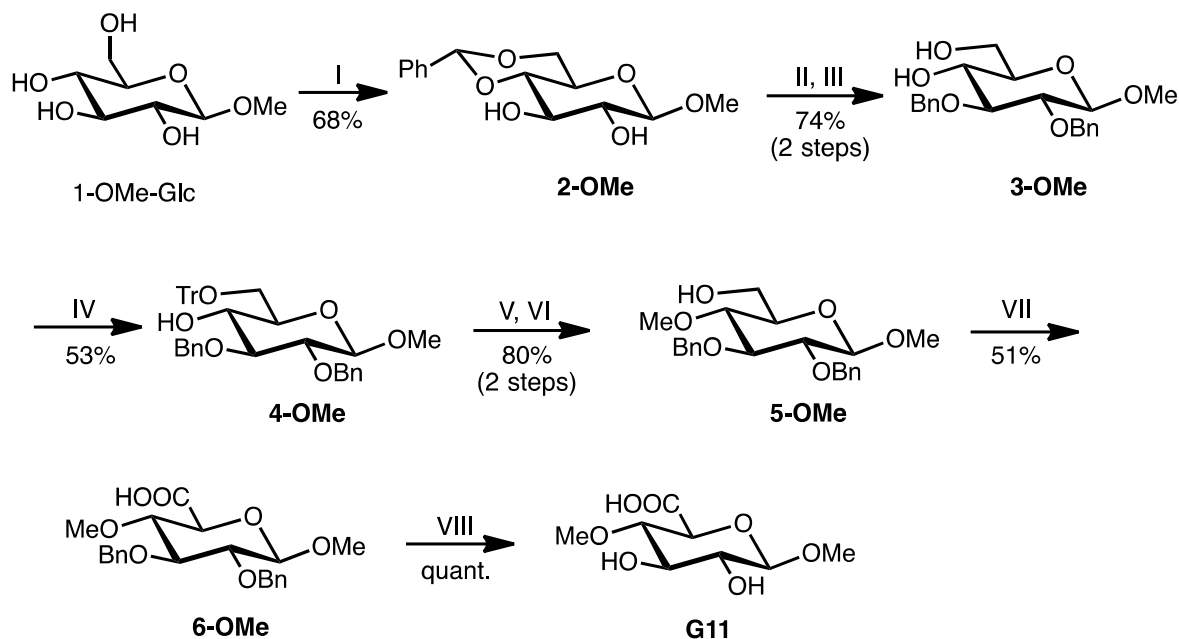

**Fig S8.** Synthesis of 4-Me-GlcA- $\beta$ -OMe (**G11**)

Reagents and reaction conditions: I)  $\text{TsOH} \oplus \text{H}_2\text{O}$ , benzaldehyde dimethyl acetal,  $50^\circ\text{C}$ , 3 h; II) NaH, benzyl bromide (BnBr), DMF,  $0^\circ\text{C}$  then room temperature (RT), overnight; III)  $\text{TsOH} \oplus \text{H}_2\text{O}$ , MeOH,  $\text{CH}_2\text{Cl}_2$ , RT; IV) TrCl, DMAP, pyridine,  $50^\circ\text{C}$ , overnight; V) NaH, Me-I, DMF,  $0^\circ\text{C}$  then RT, overnight; VI)  $\text{TsOH} \oplus \text{H}_2\text{O}$ , MeOH,  $\text{CH}_2\text{Cl}_2$ , RT; VII) AZADO, (diacetoxyiodo)benzene, buffer,  $\text{CH}_2\text{Cl}_2$ ,  $0^\circ\text{C}$ , 3 h; VIII)  $\text{Pd}(\text{OH})_2/\text{C}$ ,  $\text{H}_2$  atm., EtOAc, MeOH, RT, overnight.

**Preparation of glycosyl donor GD1 (Fig. S1)**

Benzyl(2*S*,3*S*,4*S*,5*R*)-4,5-bis(benzyloxy)-3-methoxy-6-(*p*-tolylthio)tetrahydro-2*H*-pyran-2-carboxylate

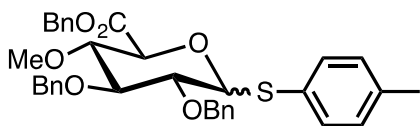

**GD1**

The treatment of **7a** (ref. 1S) (239 mg, 0.50 mmol) with acetic anhydride (2 mL) and triethylamine (2 mL) under ambient condition smoothly afforded the corresponding acetyl glycoside **8a** within 4 h (the completion of the reaction was

monitored by TLC). The reaction mixture was concentrated *in vacuo*, yielding a viscous residue, which was further purified by flash column chromatography (hexane/EtOAc = 5:1) to give **8a** as an oil liquid.

A dry CH<sub>2</sub>Cl<sub>2</sub> was added to a Schlenk tube containing **8a** (ca. 0.50 mmol) and Tol-SH (74.0 mg, 0.60 mmol, 1.2 equiv.) under a N<sub>2</sub> atmosphere, and the reaction mixture was cooled down to 0 °C before catalytic amount of BF<sub>3</sub>⊕Et<sub>2</sub>O 1M in Et<sub>2</sub>O (10 μL, 0.01 mmol, 0.02 equiv.) was added dropwise to the mixture. The reaction mixture was stirred for 3 h at RT and then cooled to 0 °C before 100 μL of triethylamine was added slowly to quench the reaction. After that, the mixture was allowed to increase to RT and concentrated *in vacuo*. The resultant viscous residue was subjected to silica gel column chromatography (hexane/EtOAc = 5:1) to afford **GD1** as a colorless viscous liquid (mixture of two anomers) in 195 mg (0.34 mmol, 67% yield in 2 steps).

<sup>1</sup>H NMR (CDCl<sub>3</sub>, 400 MHz) δ 2.30 (s, 3H), 2.32 (s, 1H, these two singlets are –Me in –tolyl group of two anomers), 3.37 (s, 1H), 3.41 (s, 3H, these two singlets are 4-O-Me group of two anomers), 3.48–3.51 (m, 1H), 3.57–3.59 (m, 0.3H), 3.76–3.84 (m, 2H) 4.56–4.92 (m, 6H), 5.21 (q, *J* = 12.4 Hz, 2.5H), 5.48 (d, *J* = 5.2 Hz, 0.7H), 7.01 (d, *J* = 7.9 Hz, 1.9H), 7.05 (d, *J* = 7.9 Hz, 0.7H), 7.29–7.37 (m, 23H).

<sup>13</sup>C NMR (CDCl<sub>3</sub>, 100 MHz) δ 21.1, 60.5, 60.6, 67.1, 67.2, 70.8, 72.6, 75.4, 75.6, 75.7, 77.9, 79.0, 80.0, 80.7, 81.1, 81.5, 85.8, 87.9, 88.2, 127.6, 127.8(5), 127.9, 128.1, 128.2, 128.3, 128.3(8), 128.4(2), 128.5, 129.7, 132.8, 133.1, 135.2, 137.5, 137.7, 138.2, 138.5, 98.7, 127.7, 127.9, 128.0, 128.2, 128.4, 137.3, 137.4, 137.7, 138.2, 138.5, 169.1.

#### Preparation of glycosyl donor **GD2** (Fig. S1)

((2*S*,3*R*,4*S*,5*R*)-6-(Allyloxy)-3-benzyl-4,5-bis(benzyloxy)tetrahydro-2*H*-pyran-2-yl)m ethanol

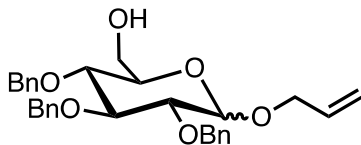

**5b**

To a stirred solution of trityl ether **4** [ref. S1] (2.57 g, 4.0 mmol) in DMF (60 mL), a 60% dispersion of NaH in mineral oil (240 mg, 6.0 mmol, 1.5 equiv.) was added at 0°C. After stirring the mixture for 30 min, benzyl bromide (BnBr: 710  $\mu$ L, 6.0 mmol) was added, and the resultant mixture was stirred for a further 3 h at RT. After adding MeOH (1.5 equiv.) to stop the reaction, the reaction mixture was extracted three times with H<sub>2</sub>O/EtOAc/hexane (2:1:1, 15 mL) to remove DMF, and dried over Na<sub>2</sub>SO<sub>4</sub>. After filtration of the organic layer, the mixture was concentrated in *vacuo*. The resultant crude product was dissolved in MeOH/CH<sub>2</sub>Cl<sub>2</sub> (1:1, 30 mL) to obtain a yellow solution, which was treated with TsOH·H<sub>2</sub>O (10 mol%) and stirred at RT for 6 h. NaHCO<sub>3</sub> was added to neutralize the solution and the resultant yellow solution was concentrated in *vacuo*, and then subjected to flash column chromatography (hexane/EtOAc = 3:1) to yield alcohol **5b** as a yellow syrup (1.67 g, 3.4 mmol, 85% yield).

<sup>1</sup>H NMR (CDCl<sub>3</sub>, 400 MHz)  $\delta$  3.50–3.56 (m, 2H), 3.65–3.78 (m, 3H), 3.97–4.06 (m, 2H), 4.14 (dd, *J* = 13.2, 5.2 Hz, 1H), 4.65 (dd, *J* = 12.0, 5.2 Hz, 2H), 4.74–4.91 (m, 4H) 4.93–5.02 (m, 1H), 5.23 (d, *J* = 10.4 Hz, 1H), 5.33 (d, *J* = 17.2 Hz, 1H), 5.88–5.97 (m, 1H), 7.29–7.37 (m, 15H).

<sup>13</sup>C NMR (CDCl<sub>3</sub>, 100 MHz)  $\delta$  61.8, 68.2, 70.8, 73.2, 75.0, 75.7, 79.9, 81.9, 95.6, 118.2, 127.8, 127.9, 128.0, 128.3, 128.3(8), 128.4(2), 133.6, 138.1, 138.7.

Benzyl(2*S*,3*S*,4*S*,5*R*)-6-(allyloxy)-3,4,5-tris(benzyloxy)tetrahydro-2*H*-pyran-2-carboxylate

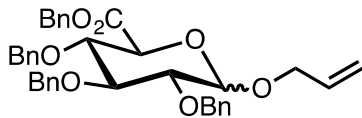

**6b**

To a solution of **5b** (980 mg, 2.0 mmol,) in CH<sub>2</sub>Cl<sub>2</sub> (4 mL) and buffer (Na<sub>2</sub>HPO<sub>4</sub>/NaH<sub>2</sub>PO<sub>4</sub>, pH = 7), iodobenzene diacetate (1.29 g, 4.0 mmol) was added at 0°C, followed by addition of 2-azaadamantane *N*-oxyl (AZADO: 15.0 mg, 0.1 mmol, 0.1 equiv.). The mixture was stirred at the same temperature (the completion of the reaction was monitored by TLC). After 2 h, **5b** was consumed and then the reaction mixture was extracted three times with CH<sub>2</sub>Cl<sub>2</sub> and water. The organic layer was dried over Na<sub>2</sub>SO<sub>4</sub> and the solvent was removed *in vacuo*. A yellow liquid was obtained, to which was added dry DMF (5 mL), followed by KHCO<sub>3</sub> (1.0 g, 10.0 mmol, 5.0 equiv.), BnBr (710 μL, 6.0 mmol, 3.0 equiv.), and tetrabutylammonium iodide (TBAI: 74.0 mg, 0.20 mmol, 0.1 equiv.). After stirring at RT for 3 h, the reaction mixture was extracted three times with EtOAc/H<sub>2</sub>O (1:1, 10 mL). The organic layer was concentrated *in vacuo*, and the residue was purified by silica gel column chromatography (hexane/EtOAc = 5:1) to yield **6b** as a colorless oil liquid (713 mg, 1.2 mmol, 60% yield).

<sup>1</sup>H NMR (CDCl<sub>3</sub>, 400 MHz) δ 3.57–3.63 (m, 1H), 3.74 (t, *J* = 10.0 Hz, 1H), 3.99–4.06 (m, 2H), 4.18 (dd, *J* = 13.2, 5.2 Hz, 1H), 4.26–4.32 (m, 1H), 4.42–4.47 (m, 1H), 4.62–4.67 (m, 1H), 4.71–4.85 (m, 4H), 4.92–4.99 (m, 1H), 5.11–5.23 (m, 3H), 5.28–5.35 (m, 1H), 5.86–5.96 (m, 1H), 7.10–7.15 (m, 2H), 7.21–7.25 (m, 3H), 7.29–7.34 (m, 15H)

<sup>13</sup>C NMR (CDCl<sub>3</sub>, 100 MHz) δ 67.2, 68.6, 70.5, 73.4, 75.0, 75.8, 79.2, 79.6, 81.3, 96.1, 118.7, 127.6, 127.7, 127.8(8), 127.9(2), 128.1, 128.2, 128.3, 128.3(7), 128.4(1), 128.5, 133.2, 135.0, 137.8, 137.9, 138.5, 169.5

Benzyl(2*S*,3*S*,4*S*,5*R*)-3,4,5-tris(benzyloxy)-6-hydroxytetrahydro-2*H*-pyran-2-carboxylate

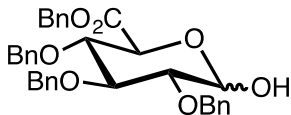

**7b**

A mixture of **6b** (594 mg, 1.0 mmol), sodium acetate (205 mg, 2.5 mmol, 2.5 equiv.), PdCl<sub>2</sub> (212 mg, 1.2 mmol, 1.2 equiv.), and aqueous acetic acid (acetic acid/H<sub>2</sub>O = 11:1, 12 mL) was stirred at RT for 48 h. After removing acetic acid and water in *vacuo*, the residue was subjected to silica gel column chromatography (hexane/EtOAc = 3:1) to afford **7b** as a white amorphous solid (421 mg, 0.76 mmol, 76% yield).

<sup>1</sup>H NMR (CDCl<sub>3</sub>, 400 MHz) δ 3.11 (s, 1H), 3.60 (dd, *J* = 9.2, 3.2 Hz, 1H), 3.76 (t, *J* = 9.6 Hz, 1H), 3.95–4.03 (m, 1H), 4.49 (dd, *J* = 16.0, 9.6 Hz, 2H), 4.65–4.80 (m, 4H), 4.86–4.93 (m, 1H), 5.09–5.23 (m, 3H), 7.12–7.15 (m, 2H), 7.25–7.26 (m, 3H), 7.29–7.32 (m, 15H)

<sup>13</sup>C NMR (CDCl<sub>3</sub>, 100 MHz) δ 67.2, 70.5, 73.3, 74.8, 75.6, 79.1, 79.3, 80.6, 91.5, 127.6, 127.7, 127.9, 128.0, 128.0(5), 128.1(1), 128.2, 128.3, 128.5, 128.6, 134.9, 137.5, 137.7, 138.3, 169.6

Benzyl(2*S*,3*S*,4*S*,5*R*)-3,4,5-tris(benzyloxy)-6-(*p*-tolylthio)tetrahydro-2*H*-pyran-2-carboxylate

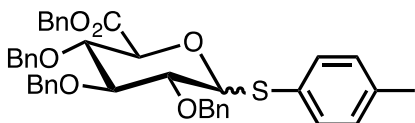

**GD2**

Same procedures as the preparation of **GD1**: treatment of **7b** (277 mg, 0.50 mmol) with acetic anhydride (2 mL) and triethylamine (2 mL) under ambient condition, smoothly afforded the corresponding acetyl glycoside **8b** within 4 h (the completion of the reaction was monitored by TLC). The reaction mixture was concentrated *in vacuo*, yielding a viscous residue, which was subjected to flash column chromatography (hexane/EtOAc = 5:1) to give **8b** as an oil liquid,.

A dry CH<sub>2</sub>Cl<sub>2</sub> was added to a Schlenk tube containing **8b** (ca. 0.50 mmol) and Tol-SH (74.0 mg, 0.60 mmol, 1.2 equiv.) under a N<sub>2</sub> atmosphere, and the reaction mixture was cooled down to 0 °C before catalytic amount of BF<sub>3</sub>⊕Et<sub>2</sub>O 1M in Et<sub>2</sub>O (10 μL, 0.01 mmol, 0.02 equiv.) was added dropwise to the mixture. The reaction was stirred for 3 h at RT and cooled to 0 °C before 100 μL of triethylamine was added slowly to quench the reaction. After that, the mixture was allowed to increase to RT and concentrated *in vacuo*, afforded a viscous residue, which was purified by silica gel column chromatography (hexane/EtOAc = 5:1) to afford **GD2** as a colorless viscous liquid as a mixture of two anomers (254 mg, 0.39 mmol, 77% yield in 2 steps).

<sup>1</sup>H NMR (CDCl<sub>3</sub>, 400 MHz) δ 2.31 (s), 2.33 (s) (3H) (these two singlets are –Me in –tolyl group of two anomers), 3.49 (t, *J* = 9.2 Hz), 3.69 (t, *J* = 9.2 Hz) (1H) (these two triplets are one isomeric proton from two anomers) 3.81–3.86 (m, 1H), 3.89–3.95 (m, 1H), 4.49–4.62 (m, 1H), 4.67–4.97 (m, 6H), 5.09–5.22 (m, 2H), 5.51 (s, 1H), 7.02–7.08 (m, 2H), 7.13–7.17 (m, 2H), 7.28–7.40 (m, 20H).

<sup>13</sup>C NMR (CDCl<sub>3</sub>, 100 MHz) δ 21.1, 67.2, 67.3, 70.9, 72.6, 75.0, 75.1, 75.4, 75.8, 75.9, 78.1, 79.0, 79.1(5), 79.2(2), 80.1, 81.6, 85.9, 87.9, 88.3, 127.7, 127.7(7), 127.8(0), 128.0, 128.2, 128.3, 128.3(6), 128.4(4), 128.5, 128.6, 128.9, 129.5, 129.7, 132.8, 133.1, 135.1, 137.5, 137.7, 137.8, 137.9, 138.1, 138.4, 168.0, 169.1.

#### Preparation of glycosyl donor **GD3** (Fig. S2)

Benzyl(2*S*,3*S*,4*S*,5*R*)-3,4,5-tris(benzyloxy)-6-(*p*-tolylthio)tetrahydro-2*H*-pyran-2-carboxylate

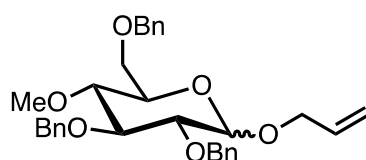

**6c**

To a stirred solution of trityl ether **5a** [ref. S1] (828 mg, 2.0 mmol) in DMF (30 mL), a 60% dispersion of NaH in mineral oil (120 mg, 3.0 mmol, 1.5 equiv.) was added at

0°C. After stirring the mixture for 30 min, benzyl bromide (355  $\mu$ L, 3.0 mmol, 1.5 equiv.) was added, and the resultant mixture was stirred for a further 3 h at RT. MeOH (1.5 equiv.) was then added to stop the reaction. The reaction mixture was extracted three times with H<sub>2</sub>O/EtOAc/hexane (2:1:1, 10 mL) to remove DMF, and dried over Na<sub>2</sub>SO<sub>4</sub>. After filtration of the organic layer, the mixture was concentrated in *vacuo*. The resultant crude product was purified by flash column chromatography (hexane/EtOAc = 3:1) to yield **6c** as a colorless oil liquid (907 mg, 0.18 mmol, 90% yield).

<sup>1</sup>H NMR (CDCl<sub>3</sub>, 400 MHz)  $\delta$  3.46 (s, 3H), 3.48–3.55 (m, 1H), 3.61–3.74 (m, 4H), 3.89 (t, *J* = 9.6 Hz, 1H), 3.98–4.03 (m, 1H), 4.13–4.18 (m, 1H), 4.49–4.65 (m, 3H), 4.74–4.81 (m, 3H), 4.88–4.96 (m, 1H), 5.10 (dd, *J* = 1.6, 1.0 Hz, 1H), 5.28–5.33 (m, 1H), 5.88–5.98 (m, 1H), 7.27–7.40 (m, 15H)

<sup>13</sup>C NMR (CDCl<sub>3</sub>, 100 MHz)  $\delta$  60.6, 68.1, 68.5, 70.2, 73.2, 73.4, 75.6, 79.4, 79.6, 82.0, 95.6, 118.1, 127.5, 127.6, 127.8, 127.9, 128.0, 128.1, 128.2(5), 128.2(8), 128.3, 133.7, 138.0, 138.2, 138.9

(3*R*,4*S*,5*R*,6*R*)-3,4-Bis(benzyloxy)-6-((benzyloxy)methyl)-5-methoxytetrahydro-2*H*-pyran-2-ol

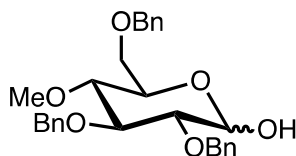

**7c**

A mixture of **6c** (504 mg, 1.0 mmol), sodium acetate (205 mg, 2.5 mmol, 2.5 equiv.), PdCl<sub>2</sub> (212 mg, 1.2 mmol, 1.2 equiv.), and aqueous acetic acid (acetic acid/H<sub>2</sub>O = 11:1, 12 mL) was stirred at RT for 48 h. After removing acetic acid and water in *vacuo*, the residue was subjected to silica gel column chromatography (hexane/EtOAc = 3:1) to afford **7c** as a white amorphous solid (348 mg, 0.75 mmol, 75% yield).

<sup>1</sup>H NMR (CDCl<sub>3</sub>, 400 MHz)  $\delta$  3.28–3.38 (m, 1H), 3.47 (s, 3H), 3.51–3.55 (m, 1H),

3.63–3.74 (m, 2H), 3.85 (t,  $J = 9.6$  Hz, 1H), 3.91–3.95 (m, 1H), 4.50–4.95 (m, 7H),  
5.20 (d,  $J = 3.6$  Hz, 1H), 7.29–7.39 (m, 15H).

$^{13}\text{C}$  NMR ( $\text{CDCl}_3$ , 100 MHz)  $\delta$  60.6, 68.6, 70.1, 73.1, 73.4, 75.5, 79.5, 79.6, 79.7,  
81.5, 91.2, 127.5(7), 127.6(3), 127.8, 127.9, 128.0, 128.1, 128.3, 128.4, 130.1,  
137.8, 138.6

(3*R*,4*S*,5*R*,6*R*)-3,4-Bis(benzyloxy)-6-((benzyloxy)methyl)-5-methoxy-2-(*p*-tolylthio)tetrahydro-2*H*-pyran

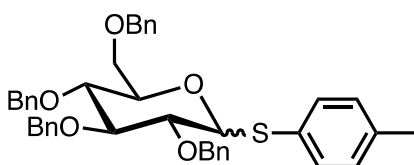

**GD3**

Same procedures as the preparation of **GD1** and **GD2** (Fig. S1): treatment of **7c** (232 mg, 0.50 mmol) with acetic anhydride (2 mL) and triethylamine (2 mL) under ambient condition, smoothly afforded the corresponding acetyl glycoside **8c** within 4 h (the completion of the reaction was monitored by TLC). The reaction mixture was concentrated *in vacuo*, yielding a viscous residue, which was subjected to flash column chromatography (hexane/EtOAc = 5:1) to give **8c** as an oil liquid.

A dry  $\text{CH}_2\text{Cl}_2$  was added to a Schlenk tube containing **8c** (ca. 0.50 mmol) and Tol-SH (74.0 mg, 0.60 mmol, 1.2 equiv.) under a  $\text{N}_2$  atmosphere. The reaction mixture was cooled down to 0 °C before catalytic amount of  $\text{BF}_3 \cdot \text{Et}_2\text{O}$  1M in  $\text{Et}_2\text{O}$  (10  $\mu\text{L}$ , 0.01 mmol, 0.02 equiv.) was added dropwise to the mixture. The mixture was stirred for 3 h at RT and cooled to 0 °C before 100  $\mu\text{L}$  of triethylamine was added slowly to quench the reaction. After that, the mixture was allowed to increase to RT and concentrated *in vacuo* to afford a viscous residue which was purified by silica gel column chromatography (hexane/EtOAc = 5:1) to afford **GD3** as a colorless viscous liquid as a mixture of two anomers (158 mg, 0.33 mmol, 65% yield in 2 steps).

$^1\text{H}$  NMR ( $\text{CDCl}_3$ , 400 MHz)  $\delta$  2.29 (s), 2.31 (s) (3H) (these two singlets are –Me in –

tolyl group of two anomers), 3.49 (s), 3.51 (s) (3H) (these two singlets are –Me in 4–  
O-Me group of two anomers) 3.57–3.65 (m, 1H), 3.72–3.85 (m, 2H), 4.26 (dd,  $J$  =  
8.0, 2.0 Hz 1H), 4.45 (d,  $J$  = 12.4 Hz, 1H), 4.56–4.89 (m, 6H), 4.96 (d,  $J$  = 10.8 Hz,  
1H), 5.55 (d,  $J$  = 5.2 Hz, 1H), 7.01–7.06 (m, 2H), 7.28–7.38 (m, 17H).  
 $^{13}\text{C}$  NMR ( $\text{CDCl}_3$ , 100 MHz)  $\delta$  21.3, 60.9, 68.8, 69.3, 71.2, 72.6, 73.5, 75.5, 75.8,  
75.9, 79.2, 79.3, 79.7, 79.9, 80.7, 82.6, 86.8, 87.5, 87.7, 127.7, 127.9, 128.0, 128.1,  
128.1(7), 128.2(4), 128.3, 128.4, 128.5, 128.6, 129.8, 130.8, 132.2, 132.8, 137.3,  
137.9, 138.2, 138.6, 138.9

### Preparation of glycosyl donor **GA1** and **GA2** (Fig. S3)

((2*R*,3*S*,4*S*,5*R*)-3,4,5,6-Tetrakis(benzyloxy)tetrahydro-2*H*-pyran-2-yl)methanol

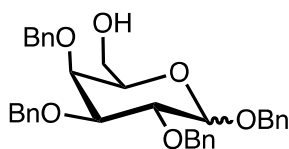

**GA1**

Triphenylmethyl chloride (306 mg, 1.1 mmol) was added to a stirred solution of  
D-galactose (180 mg, 1.0 mmol) in pyridine (2 mL), and the mixture was heated at  
50 °C for overnight to afford a yellow suspension. MeOH (1.5 equiv.) was added to  
quench the reaction, affording yellow solution, which was concentrated *in vacuo*.  
The resultant syrup was purified by flash column chromatography (EtOAc/MeOH =  
4:1) to give crude trityl ether, a white fluffy solid, as the precursor of **GA1**, which can  
be used for next step.

A stirred suspension of crude trityl ether in dry DMF (5 mL) was added NaH (60%  
in mineral oil, 60.0 mg, 1.5 mmol) in 2 portions at 0 °C, and stirred for 30 min,  
followed by treatment of benzyl bromide (178  $\mu\text{L}$ , 1.5 mmol, 1.5 equiv.), stirred for 8  
h at RT, MeOH (1.5 equiv.) was added to quench the reaction slowly until no gas  
was formed. After extracted 2 times with EtOAc/ $\text{H}_2\text{O}$  (1:1, 10 mL), the organic layer  
was concentrated *in vacuo*. The  $\text{CH}_2\text{Cl}_2$ /MeOH solution of the yielded mixture was  
added TsOH· $\text{H}_2\text{O}$  (15 mol%) then it was stirred at RT for overnight. The solution

was neutralized with NaHCO<sub>3</sub>, and organic solvent was removed in *vacuo* to afford a crude viscous liquid. Column chromatography (hexane/EtOAc = 3:1) yielded glycosyl acceptor **GA1** (254 mg, 0.47 mmol, 47% yield) as a white solid.

<sup>1</sup>H NMR (CDCl<sub>3</sub>, 400 MHz) δ 2.13–2.16 (m, 1H), 3.58–3.67 (m, 2H), 3.72–3.78 (m, 1H), 4.06–4.10 (m, 2H), 4.34 (t, *J* = 7.2 Hz, 1H), 4.48 (dd, *J* = 12.4, 7.2 Hz, 2H), 4.56–4.65 (m, 3H), 4.71–4.83 (m, 3H), 4.98 (d, *J* = 2.0 Hz, 1H), 7.27–7.36 (m, 20H).  
<sup>13</sup>C NMR (CDCl<sub>3</sub>, 100 MHz) δ 61.5, 69.1, 72.3, 72.7, 81.0, 83.8, 98.7, 127.7, 127.9, 128.0, 128.2, 128.4, 137.3, 137.4, 137.7, 138.3.

((2*R*,3*R*,4*S*,5*R*)-3,4,5,6-Tetrakis(benzyloxy)tetrahydro-2*H*-pyran-2-yl)methanol

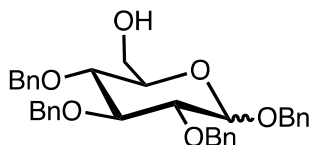

**GA2**

**GA2** as a white solid (270 mg, 0.50 mmol, 50% yield) was prepared from D-glucose (180 mg, 1.0 mmol) in the same procedures as **GA1** described above.

<sup>1</sup>H NMR (CDCl<sub>3</sub>, 400 MHz) δ 1.85 (t, *J* = 7.2 Hz, 1H), 3.34–3.39 (m, 1H), 3.49 (t, *J* = 8.0 Hz, 1H), 3.57 (t, *J* = 9.6 Hz, 1H), 3.67–3.73 (m, 2H), 3.85–3.90 (m, 1H), 4.56–4.88 (m, 6H), 4.91–5.00 (m, 3H), 7.25–7.38 (m, 20H).  
<sup>13</sup>C NMR (CDCl<sub>3</sub>, 100 MHz) δ 62.0, 71.6, 74.9(5), 75.0(2), 75.7, 77.5, 82.3, 84.5, 102.8, 127.6, 127.7, 127.8(5), 127.9(1), 128.0, 128.1, 128.3, 128.4, 128.5, 137.2, 137.9, 138.2, 138.4.

#### Preparation of glycosyl donor **GA3** (Fig. S4)

(3*R*,4*S*,5*R*,6*R*)-2-(Benzyloxy)-6-(hydroxymethyl)tetrahydro-2*H*-pyran-3,4,5-triol

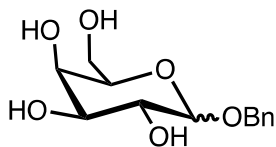

**9a**

To a stirred solution of D-glucose [ref. S2] (1.8 g, 10.0 mmol) in DMF (30 mL), a 60% dispersion of NaH in mineral oil (400 mg, 10.0 mmol, 1.0 equiv.) was added at 0°C. After stirring the mixture for 30 min, benzyl bromide (BnBr: 140  $\mu$ L, 1.2 mmol, 1.2 equiv.) was added to the resultant mixture, stirred for a further 3 h at RT; MeOH (1.2 equiv.) was then added to stop the reaction. The reaction mixture was concentrated in *vacuo*, followed by flash column chromatography (EtOAc/MeOH = 4:1) to yield **9a** as an amorphous white solid (1.30 g, 4.8 mmol, 48% yield).

<sup>1</sup>H NMR (CD<sub>3</sub>OD, 400 MHz)  $\delta$  3.30 (t, *J* = 1.2 Hz, 1H), 3.43–3.51 (m, 2H), 3.58 (dd, *J* = 10.0, 8.0 Hz, 1H), 3.71–3.89 (m, 4H), 4.30 (d, *J* = 8.0 Hz, 1H), 4.65 (d, *J* = 12.0 Hz, 1H), 4.83–4.94 (m, 3H), 7.25–7.33 (m, 3H), 7.41 (d, *J* = 7.2 Hz, 2H).

<sup>13</sup>C NMR (CD<sub>3</sub>OD, 100 MHz)  $\delta$  62.5, 70.2, 71.6, 72.5, 74.9, 76.6, 103.8, 128.6, 129.1, 129.2, 139.1

(3a*S*,4*R*,7*R*,7a*R*)-6-(Benzyloxy)-4-(hydroxymethyl)-2,2-dimethyltetrahydro-4*H*-[1,3]dioxolo[4,5-*c*]pyran-7-ol

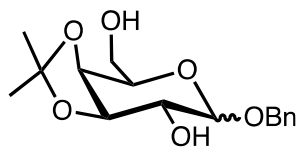

**10a**

( $\pm$ )-CSA (51.0 mg, 0.22 mmol, 0.05 equiv.) was added to a solution of **9a** (1.20 g, 4.4 mmol) in acetone dimethylacetal (35 mL) and the solution was stirred overnight at room temperature. The reaction mixture was treated with triethylamine and concentrated to a residue, which was then dissolved in a mixture of MeOH/H<sub>2</sub>O 10:1 (35 mL) and refluxed for 48 h. The reaction mixture was concentrated to a residue, which was subjected to silica gel column chromatography (hexane/EtOAc = 1:1) to yield **10a** as a white solid (1.27 g, 4.1 mmol, 93% yield).

<sup>1</sup>H NMR (CDCl<sub>3</sub>, 400 MHz)  $\delta$  1.35 (s, 3H), 1.52 (s, 3H), 1.61 (d, *J* = 3.6 Hz, 1H), 2.04–2.08 (m, 1H), 2.44 (q, *J* = 2.0 Hz, 1H), 3.62 (td, *J* = 8.4, 2.4 Hz, 1H), 3.82–3.87 (m, 2H), 3.96–4.01 (m, 1H), 4.09 (dd, *J* = 7.2, 5.6 Hz, 1H), 4.15 (dd, *J* = 5.2, 2.0 Hz,

1H), 4.29 (d,  $J$  = 8.4 Hz, 1H), 4.66 (d,  $J$  = 12.0 Hz, 1H), 4.92 (d,  $J$  = 12.0 Hz, 1H), 7.30–7.38 (m, 5H).

$^{13}\text{C}$  NMR ( $\text{CDCl}_3$ , 100 MHz)  $\delta$  26.3, 28.1, 62.4, 71.3, 73.5, 73.6, 73.9, 78.8, 101.2, 110.4, 128.1, 128.2, 128.5, 136.8

(2*R*,3*R*,4*S*,5*R*)-5,6-Bis(benzyloxy)-2-((benzyloxy)methyl)tetrahydro-2*H*-pyran-3,4-diol

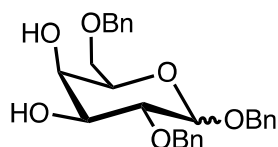

**11a**

A stirred suspension of **10a** (1.24 g, 4.0 mmol) in dry DMF (10 mL) was added NaH (60% in mineral oil, 400 mg, 10.0 mmol, 2.5 equiv.) in 2 portions at 0 °C, and stirred for 2 h, followed by treatment of benzyl bromide (1.2 mL, 10.0 mmol, 2.5 equiv.), stirred for 8 h at RT, MeOH (1.5 equiv.) was added to quench the reaction slowly until no gas was formed. After extracted 2 times with EtOAc/ $\text{H}_2\text{O}$  (1:1, 10 mL), the organic layer was concentrated *in vacuo*. Aqueous acetic acid (60%) was added to the crude residue, stirred at 65°C for 2 h. Most solvent was removed in *vacuo* before  $\text{NaHCO}_3$  and MeOH was added to neutralize the residual HOAc. The mixture was stirred for 30 min and then concentrated in *vacuo* to afford a crude viscous, followed by column chromatography (hexane/EtOAc = 1:1), yielded **11a** (990 mg, 2.2 mmol, 55% yield) as a white solid.

$^1\text{H}$  NMR ( $\text{CDCl}_3$ , 400 MHz)  $\delta$  2.47 (d,  $J$  = 2.8 Hz, 1H), 2.57 (d,  $J$  = 2.8 Hz, 1H), 3.55–3.59 (m, 2H), 3.63 (t,  $J$  = 5.6 Hz, 1H), 3.76–3.84 (m, 2H), 4.01 (s, 1H), 4.48 (d,  $J$  = 7.6 Hz, 1H), 4.61 (s, 2H), 4.66 (d,  $J$  = 11.6 Hz, 2H), 4.98 (dd,  $J$  = 11.6, 4.0 Hz, 2H), 7.29–7.39 (m, 15H).

$^{13}\text{C}$  NMR ( $\text{CDCl}_3$ , 100 MHz)  $\delta$  68.9, 69.3, 70.9, 73.1, 73.3, 73.7, 74.6, 79.1, 102.4, 127.6(9), 127.7(4), 127.8, 127.8(5), 127.9(1), 128.1, 128.4, 128.4, 128.5, 137.3, 137.8, 138.2.

(2*R*,3*S*,4*S*,5*R*)-5,6-Bis(benzyloxy)-2-((benzyloxy)methyl)-4-((4-methoxybenzyl)oxy) tetrahydro-2*H*-pyran-3-ol

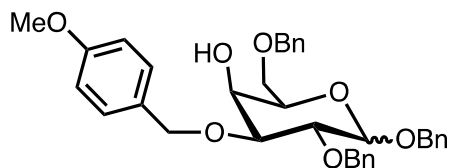

**12a**

A mixture of **11a** (900 mg, 2.0 mmol) and dibutyltin oxide (600 mg, 2.4 mmol, 1.2 equiv.) in methanol (10 mL) was refluxed for 10 h with stirring. The solvent was removed and dried in *vacuo*. To the residue in dry benzene (10 mL) was added *para*-methoxy benzyl chloride (PMB-Cl: 540  $\mu$ L, 4.0 mmol, 2.0 equiv.), MS4Å (0.4 g) and tetrabutylammonium bromide (TBAB: 322 mg, 1.0 mmol, 0.5 equiv.), refluxed for 6 h. The mixture was concentrated in *vacuo*, followed by column chromatography (hexane/EtOAc = 3:1), yielded **12a** as a viscous oil liquid (1.01 g, 1.8 mmol, 89% yield).

<sup>1</sup>H NMR (CDCl<sub>3</sub>, 400 MHz)  $\delta$  3.47 (dd, *J* = 9.6, 3.2 Hz, 1H), 3.57 (q, *J* = 5.2 Hz, 1H), 3.69 (dd, *J* = 9.6, 8.0 Hz, 1H), 3.76–3.84 (m, 5H), 4.00 (s, 1H), 4.46–4.47 (m, 1H), 4.61–4.74 (m, 7H), 4.90–5.00 (m, 2H), 6.84 (dd, *J* = 6.8, 2.0 Hz, 2H), 7.24–7.38 (m, 17H).

<sup>13</sup>C NMR (CDCl<sub>3</sub>, 100 MHz)  $\delta$  55.2, 68.9, 70.9, 72.7, 73.5, 74.4, 75.2, 79.6, 82.0, 102.8, 113.7, 127.4(7), 127.5(2), 127.6, 127.8, 127.9, 128.1, 128.2, 128.3, 128.3(5), 128.4(1), 129.2, 130.6, 137.6, 137.9, 138.6, 138.7, 159.1.

(3*R*,4*S*,5*R*,6*R*)-2,3,5-Tris(benzyloxy)-6-((benzyloxy)methyl)tetrahydro-2*H*-pyran-4-ol

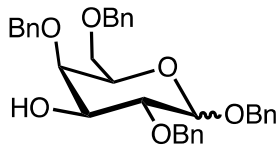

### GA3

A stirred suspension of **12a** (620 mg, 2.0 mmol) in dry DMF (5 mL) was added NaH (60% in mineral oil, 200 mg, 5.0 mmol, 2.5 equiv.) in 2 portions at 0 °C, and stirred for 2 h, followed by treatment of benzyl bromide (600  $\mu$ L, 5.0 mmol, 2.5 equiv.), stirred for 8 h at RT, MeOH (1.5 equiv.) was added to quench the reaction slowly until no gas was formed and organic solvent was removed in *vacuo*. The mixture was dissolved in CH<sub>2</sub>Cl<sub>2</sub> and washed with 2M HCl and then with saturated NaHCO<sub>3</sub> solution, dried over Na<sub>2</sub>SO<sub>4</sub> and then concentrated. Water (1 mL) was added to the resultant mixture in CH<sub>2</sub>Cl<sub>2</sub> (15 mL) followed by addition of 2,3-dichloro-5,6-dicyanobenzoquinone (DDQ: 680 mg, 3.0 mmol 1.5 equiv.) under stirring. The mixture was stirred for 1 h at room temperature and the completion of the reaction was monitored by TLC. CH<sub>2</sub>Cl<sub>2</sub> was filtered and the residue was repeatedly washed with CH<sub>2</sub>Cl<sub>2</sub>. Filtrates were collected, washed with NaHCO<sub>3</sub> solution, dried over Na<sub>2</sub>SO<sub>4</sub> and then concentrated. The residue was subjected to silica gel column chromatography (hexane/EtOAc = 5:1), yielded **GA3** as an oil (775 mg, 1.4 mmol, 72% yield).

<sup>1</sup>H NMR (CDCl<sub>3</sub>, 400 MHz)  $\delta$  2.26 (d, *J* = 3.2 Hz, 1H), 3.60–3.67 (m, 5H), 3.87 (s, 1H), 4.44–4.53 (m, 3H), 4.62–4.69 (m, 3H), 4.79 (d, *J* = 11.6 Hz, 1H), 4.96 (q, *J* = 6.0 Hz, 2H), 7.29–7.37 (m, 20H).

<sup>13</sup>C NMR (CDCl<sub>3</sub>, 100 MHz)  $\delta$  68.7, 70.8, 73.5, 73.6, 74.0, 74.6, 74.9, 75.4, 79.6, 102.5, 127.6, 127.7, 127.8, 128.1, 128.2(5), 128.2(8), 128.4, 137.4, 137.8, 138.3, 138.4

### Preparation of glycosyl donor **GA4** (Fig. S5)

(3*R*,4*S*,5*R*)-2-(Benzyloxy)tetrahydro-2*H*-pyran-3,4,5-triol

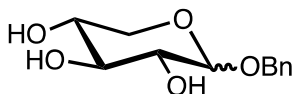

**9b**

To a stirred solution of D-xylose [ref. S2] (3.0 g, 20.0 mmol) in DMF (30 mL), a 60% dispersion of NaH in mineral oil (800 mg, 20.0 mmol, 1.0 equiv.) was added in 3 portions at 0°C. After stirring the mixture for 30 min, benzyl bromide (BnBr: 280  $\mu$ L, 2.4 mmol, 1.2 equiv.) was added to the resultant mixture, stirred for a further 3 h at RT; MeOH (1.2 equiv.) was then added to stop the reaction. The reaction mixture was concentrated in *vacuo*, followed by flash column chromatography (EtOAc/MeOH = 4:1) to yield **9b** as an amorphous white solid (2.16 g, 9.0 mmol, 45% yield).

$^1\text{H}$  NMR ( $\text{CDCl}_3$ , 400 MHz)  $\delta$  2.10 (s, 1H), 3.18–3.23 (m, 1H), 3.39–3.46 (m, 1H), 3.58–3.69 (m, 1H), 3.84–3.99 (m, 1H), 4.33–4.37 (m, 1H), 4.45 (d,  $J$  = 12.0 Hz, 1H), 4.54 (d,  $J$  = 12.0 Hz, 1H), 4.71 (d,  $J$  = 12.0 Hz, 1H), 4.83 (d,  $J$  = 12.0 Hz, 1H), 5.30 (s, 1H), 7.27–7.33 (m, 5H).

$^{13}\text{C}$  NMR ( $\text{CDCl}_3$ , 100 MHz)  $\delta$  61.7, 65.2, 69.1, 69.5, 69.8, 70.9, 71.8, 73.0, 74.3, 76.0, 97.5, 102.1, 127.9, 128.0, 128.1, 128.4, 136.9.

(2*R*,3*R*,4*aR*,8*R*,8*aR*)-7-(Benzyloxy)-2,3-dimethoxy-2,3-dimethylhexahydro-5*H*-pyran[3,4-*b*][1,4]dioxin-8-ol

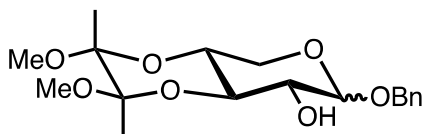

**10b**

To a solution of **9b** [ref. S6] (1.92 g, 8.0 mmol) in MeOH (30 mL), trimethyl orthoformate (4.4 mL, 40.0 mmol, 5.0 equiv.), 2,3-butanedione (1 mL, 12.0 mmol, 1.5 equiv.), and ( $\pm$ )-CSA (200 mg) were added and the mixture was refluxed for 20 h under an argon atmosphere, cooled to room temperature and neutralized by the addition of triethylamine (1 mL). Solvents were evaporated under reduced pressure and the residue was purified by silica gel column chromatography (hexane/EtOAc =

3:1) to afford **10b** as a white solid (1.06 g, 3.0 mmol, 38% yield).

<sup>1</sup>H NMR (CDCl<sub>3</sub>, 400 MHz) δ 1.30 (s, 3H), 1.35 (s, 3H), 3.27 (s, 3H), 3.30 (s, 3H), 3.43 (t, *J* = 9.8 Hz, 1H), 3.57–3.67 (m, 2H), 3.78–3.84 (m, 1H), 3.93 (q, *J* = 5.2 Hz, 1H), 4.36 (d, *J* = 9.8 Hz, 1H), 4.60 (d, *J* = 7.6 Hz, 1H), 4.90 (d, *J* = 7.6 Hz, 1H), 7.31–7.37 (m, 5H).

<sup>13</sup>C NMR (CDCl<sub>3</sub>, 100 MHz) δ 17.5, 17.6, 47.9, 64.1, 65.8, 71.1, 71.3, 72.2, 99.4, 99.7, 103.2, 128.0, 128.2, 128.5, 136.8.

(3*R*,4*S*,5*R*)-5-(Allyloxy)-6-(benzyloxy)tetrahydro-2*H*-pyran-3,4-diol

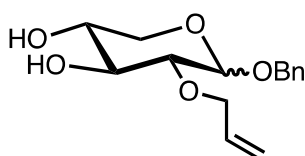

To a stirred solution of **10b** (1.0 g, 2.8 mmol) in DMF (5 mL), a 60% dispersion of NaH in mineral oil (110 mg, 2.8 mmol, 1.0 equiv.) was added in 3 portions at 0°C. After stirring the mixture for 30 min, allyl bromide (250 μL, 3.0 mmol, 1.1 equiv.) was added to the resultant mixture, stirred for a further 3 h at RT; MeOH (1.0 equiv.) was then added to stop the reaction. The reaction mixture was concentrated in *vacuo*. To a solution of the residue in dichloromethane (10 mL) was added 95% aqueous trifluoroacetic acid (5 mL) and the whole mixture was stirred for 15 min. Solvents were evaporated in *vacuo* and the residue was immediately purified by column chromatography (hexane/EtOAc = 1:1) to afford **11b** as a white solid (196 mg, 0.70 mmol, 25% yield).

<sup>1</sup>H NMR (CDCl<sub>3</sub>, 400 MHz) δ 3.35 (dd, *J* = 6.8, 4.8 Hz, 1H), 3.49 (dd, *J* = 12.0, 6.4 Hz, 1H), 3.71 (dd, *J* = 10.4, 4.8 Hz, 2H), 4.08–4.16 (m, 2H), 4.27 (dd, *J* = 12.8, 5.6 Hz, 1H), 4.59 (d, *J* = 11.6 Hz, 1H), 4.69 (d, *J* = 4.4 Hz, 1H), 4.86 (d, *J* = 12.0 Hz, 1H), 5.19–5.29 (m, 2H), 5.84–5.94 (m, 1H), 7.30–7.39 (m, 5H).

<sup>13</sup>C NMR (CDCl<sub>3</sub>, 100 MHz) δ 63.3, 69.2, 70.4, 72.5, 77.9, 100.3, 118.0, 127.9, 128.0, 128.1, 128.5, 134.0, 136.7

(3*R*,4*S*,5*R*)-3-(Allyloxy)-2,4,5-tris(benzyloxy)tetrahydro-2*H*-pyran

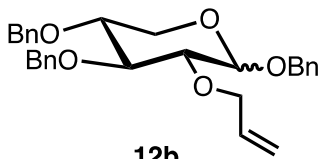

To a stirred solution of **11b** (168 mg, 0.60 mmol) in DMF (5 mL), a 60% dispersion of NaH in mineral oil (60.0 mg, 1.5 mmol, 2.5 equiv.) was added at 0°C. After stirring the mixture for 30 min, benzyl bromide (BnBr: 180  $\mu$ L, 1.5 mmol, 2.5 equiv.) was added to the resultant mixture, stirred for a further 3 h at RT; MeOH (1.2 equiv.) was then added to stop the reaction. The reaction mixture was concentrated in *vacuo*, followed by flash column chromatography (EtOAc/MeOH = 5:1) to yield **12b** as a viscous oil liquid (215 mg, 0.47 mmol, 78% yield).

<sup>1</sup>H NMR (CDCl<sub>3</sub>, 400 MHz)  $\delta$  3.20 (dd, *J* = 11.6, 6.0 Hz, 1H), 3.05 (dd, *J* = 9.2, 8.0 Hz, 1H), 3.52 (t, *J* = 9.2 Hz, 1H), 3.57–3.63 (m, 1H), 3.94 (dd, *J* = 11.6, 5.2 Hz, 1H), 4.18–4.23 (m, 1H), 4.40 (d, *J* = 7.6 Hz, 2H), 4.62 (d, *J* = 12.0 Hz, 2H), 4.74 (d, *J* = 11.6 Hz, 1H), 4.81–4.93 (m, 3H), 5.16 (dt, *J* = 10.4 Hz, 1.2 Hz, 1H), 5.26 (dt, *J* = 17.2 Hz, 2.4 Hz, 1H), 5.89–5.97 (m, 1H), 7.28–7.38 (m, 15H).

<sup>13</sup>C NMR (CDCl<sub>3</sub>, 100 MHz)  $\delta$  63.9, 71.0, 73.4, 73.8, 75.6, 77.7, 81.5, 83.7, 103.1, 116.9, 127.6, 127.7, 127.8, 128.0, 128.3, 128.3(6), 128.4(1), 135.0, 137.4, 138.2, 138.6.

(3*R*,4*R*,5*R*)-2,4,5-Tris(benzyloxy)tetrahydro-2*H*-pyran-3-ol

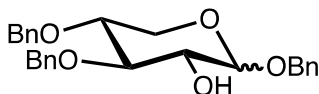

A mixture of **12b** (184 mg, 0.40 mmol), sodium acetate (82.0 mg, 1.0 mmol, 2.5 equiv.), PdCl<sub>2</sub> (85.0 mg, 0.48 mmol, 1.2 equiv.), and aqueous acetic acid (acetic acid/H<sub>2</sub>O = 11:1, 6 mL) was stirred at RT for 48 h. After removing acetic acid and water in *vacuo*, the residue was subjected to silica gel column chromatography

(hexane/EtOAc = 3:1) to afford **GA4** as a white amorphous solid (138 mg, 0.33 mmol, 82% yield).

<sup>1</sup>H NMR (CDCl<sub>3</sub>, 400 MHz) δ 2.74 (s, 1H), 3.35 (dd, *J* = 12.0, 8.0 Hz, 1H), 3.55–3.63 (m, 4H), 4.03 (dd, *J* = 11.6, 3.6 Hz, 1H), 4.46 (d, *J* = 6.0 Hz, 1H), 4.60–4.71 (m, 3H), 4.80–4.89 (m, 3H), 7.28–7.35 (m, 15H).

<sup>13</sup>C NMR (CDCl<sub>3</sub>, 100 MHz) δ 62.4, 70.5, 72.1, 72.8, 74.1, 80.9, 101.6, 127.6, 127.8, 127.9, 128.3(5), 128.4(0), 128.5, 137.2, 137.8, 138.4.

#### Typical procedure of glycosylation of GD and GA followed by deprotection for **G1-G8** and **G10** (Fig. S6)

##### Glycosylation

A 20 mL oven-dried Schlenk tube was charged with thioglycoside **GD1** (25.0 mg, 0.04 mmol) and glycosyl acceptor **GA1** (23.0 mg, 1.0 equiv.) and dry CH<sub>2</sub>Cl<sub>2</sub> (2 mL). The mixed solution was cooled down to –40 °C, N-iodosuccinimide (NIS; 18.0 mg, 0.08 mmol, 2.0 equiv.) was added until totally dissolved, followed by 2 μL of TfOH. The reaction mixture was allowed to warm to RT slowly. After that, it was cooled to 0 °C before triethylamine was added to neutralize the mixture. The mixture was concentrated *in vacuo* and purified by column chromatography (hexane/EtOAc = 5:1) to yield the mixture of two anomers (28.1 mg, 0.03 mmol, 70% yield). After TLC isolation with CHCl<sub>3</sub>/MeOH (40:1), the pure form of the β anomer (**G1'**, precursor of **G1**) was isolated as the minor product, along with α anomer (**G2'**, precursor of **G2**) as the major one.

##### Deprotection

A 20 mL Schlenk tube was charged with isolated **G1'** (7.0 mg) in MeOH/EtOAc (1:1 v/v, 2 mL) under N<sub>2</sub>, then added Pd(OH)<sub>2</sub>/C (10%) (7.0 mg), H<sub>2</sub> gas was later charged and replace the N<sub>2</sub> by air pump vacuum/H<sub>2</sub> exchange, the reaction mixture

was stirred at room temperature for overnight, the completion of the reaction was monitored by LC-MS. The mixture was subjected to filtration by passing through a packed Celite® cake, to remove Pd(OH)<sub>2</sub>/C, the crude residue was obtained after removing the solvent *in vacuo*, followed by reverse phase TLC (H<sub>2</sub>O), afforded the corresponding product **G1** as a white solid (2.5 mg, 95%). In the same procedure, the reaction of **G2'** (α anomer of **G1'**, 7.0 mg) yielded **G2** as white solid (2.5 mg, 95%).

The NMR spectra of isolated disaccharide in D<sub>2</sub>O was difficult to identify each signal to corresponding proton, nevertheless, the absence of aromatic proton in <sup>1</sup>H-NMR spectra was obviously observed which helped us to confirm the completion of the removal of all benzyl groups. The formation of desired disaccharide **G** was confirmed via HRMS showing the consistence of the found value with exact mass calculated.

Other disaccharides **G3–G8** and **G10** were synthesized in the same procedure through a glycosylation of corresponding **GD** and **GA**, followed by a hydrogenative deprotection.

The yield and additional information of each disaccharide was listed in Fig. S6.

Benzyl(2*S*,3*S*,4*S*,5*R*,6*R*)-4,5-bis(benzyloxy)-3-methoxy-6-(((2*R*,3*S*,4*S*,5*R*)-3,4,5,6-tetrakis(benzyloxy)tetrahydro-2*H*-pyran-2-yl)methoxy)tetrahydro-2*H*-pyran-2-carboxylate

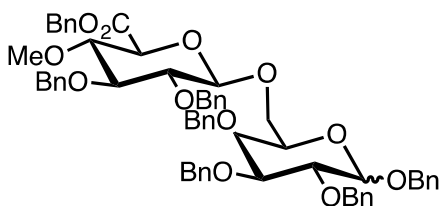

**G1'**

Glycosylation of **GD1** and **GA1** (β)

<sup>1</sup>H NMR (CDCl<sub>3</sub>, 600 MHz) δ 3.31 (s, 3H), 3.46 (t, *J* = 6.4 Hz, 1H), 3.50–3.51 (m,

562 2H), 3.67–3.70 (m, 1H), 3.75–3.78 (m, 2H), 3.98–4.02 (m, 2H), 4.09–4.11 (m, 1H),  
 563 4.35 (t,  $J = 7.2$  Hz, 1H), 4.40 (d,  $J = 7.2$  Hz, 1H), 4.45 (dd,  $J = 2.0, 12.8$  Hz, 2H),  
 564 4.53–4.58 (m, 3H), 4.65–4.75 (m, 5H), 4.83 (d,  $J = 11.0$  Hz, 1H), 4.88–5.02 (m, 2H),  
 565 5.14 (d,  $J = 8.0$  Hz, 1H), 5.17 (d,  $J = 8.1$  Hz, 1H), 7.19–7.29 (m, 35H).  
 566  $^{13}\text{C}$  NMR ( $\text{CDCl}_3$ , 150 MHz)  $\delta$  60.5, 67.1, 68.5, 69.9, 72.1, 72.3, 73.1, 74.3, 74.7,  
 567 75.5, 79.2, 80.1, 80.6, 81.1, 81.4, 83.6, 83.9, 98.1, 103.9, 127.3, 127.5, 127.6,  
 568 127.7, 127.8, 127.9, 128.2, 128.3, 128.4, 135.1, 137.4, 138.0, 138.1, 138.3, 138.4,  
 569 168.4.

570

571 (2*S*,3*S*,4*R*,5*R*,6*R*)-4,5-Dihydroxy-3-methoxy-6-(((2*R*,3*R*,4*S*,5*R*)-3,4,5,6-tetrahydrox  
 572 ytetrahydro-2*H*-pyran-2-yl)methoxy)tetrahydro-2*H*-pyran-2-carboxylic acid

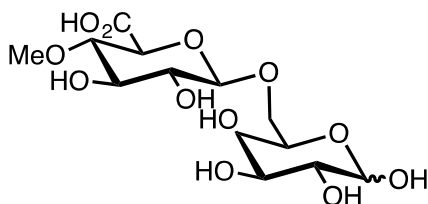

573 **G1** 4-Me-GlcA- $\beta$ (1,6)Gal

574 HRMS (ESI)  $m/z$  calcd for  $\text{C}_{13}\text{H}_{21}\text{O}_{12}$   $[\text{M}-\text{H}]^-$ : 369.1028, found: 369.1022.

575

576 Benzyl(2*S*,3*S*,4*S*,5*R*,6*S*)-4,5-bis(benzyloxy)-3-methoxy-6-(((2*R*,3*S*,4*S*,5*R*)-3,4,5,6-t  
 577 etrakis(benzyloxy)tetrahydro-2*H*-pyran-2-yl)methoxy)tetrahydro-2*H*-pyran-2-carbox  
 578 ylate

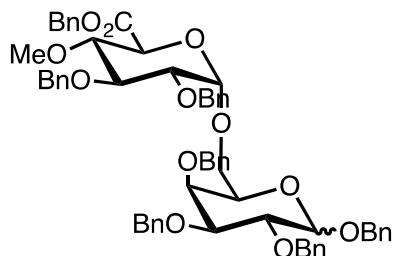

579 **G2'**

580 Glycosylation of **GD1+GA1** ( $\alpha$ )

581  $^1\text{H}$  NMR ( $\text{CDCl}_3$ , 600 MHz)  $\delta$  3.33 (s, 3H), 3.37–3.41 (m, 2H), 3.50 (dd,  $J = 9.6, 3.4$

582 Hz, 1H), 3.70 (dd,  $J = 9.6, 6.9$  Hz, 1H), 3.85–3.88 (m, 2H), 3.98–4.00 (m, 4H), 4.34  
 583 (d,  $J = 6.9$  Hz, 1H), 4.51–4.57 (m, 2H), 4.65–4.76 (m, 6H), 4.83–4.87 (m, 3H), 4.91  
 584 (d,  $J = 11.7$  Hz, 2H), 5.17 (d,  $J = 12.4$  Hz, 1H), 5.23 (d,  $J = 12.4$  Hz, 2H) 7.24–7.41  
 585 (m, 35H)  
 586  $^{13}\text{C}$  NMR ( $\text{CDCl}_3$ , 150 MHz)  $\delta$  60.6, 67.1, 68.0, 68.9, 69.5, 70.3, 73.0, 73.4, 73.5,  
 587 74.5, 75.3, 75.7, 76.4, 79.0, 79.1, 81.3, 81.8, 95.6, 97.7, 127.50, 127.55, 127.63,  
 588 127.69, 127.77, 127.86, 127.9, 128.1, 128.21, 128.26, 128.34, 128.4, 128.5, 135.2,  
 589 137.3, 138.0, 138.45, 138.5, 138.8, 169.8.

590

591 (2*S*,3*S*,4*R*,5*R*,6*S*)-4,5-Dihydroxy-3-methoxy-6-(((2*R*,3*R*,4*S*,5*R*)-3,4,5,6-tetrahydrox  
 592 ytetrahydro-2*H*-pyran-2-yl)methoxy)tetrahydro-2*H*-pyran-2-carboxylic acid

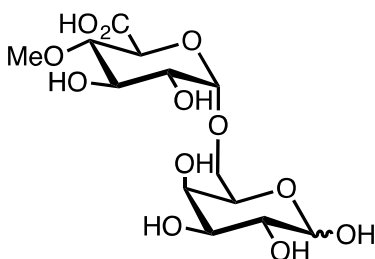

593 **G2** 4-Me-GlcA- $\alpha$ (1,6)Gal

594 HRMS (ESI)  $m/z$  calcd for  $\text{C}_{13}\text{H}_{21}\text{O}_{12}$   $[\text{M}-\text{H}]^-$ : 369.1028, found: 369.1037.

595

596 Benzyl(2*S*,3*S*,4*S*,5*R*,6*R*)-4,5-bis(benzyloxy)-3-methoxy-6-(((2*R*,3*R*,4*S*,5*R*)-3,4,5,6-  
 597 tetrakis(benzyloxy)tetrahydro-2*H*-pyran-2-yl)methoxy)tetrahydro-2*H*-pyran-2-carbo  
 598 xylate

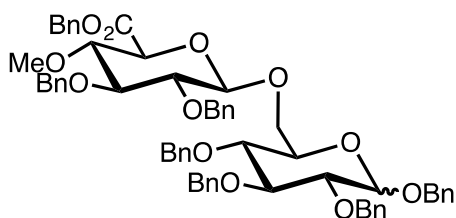

599 **G3'**

600 Glycosylation of **GD1**+**GA2** ( $\beta$ )

601  $^1\text{H}$  NMR ( $\text{CDCl}_3$ , 400 MHz)  $\delta$  3.34 (s, 3H), 3.38–3.41 (m, 1H), 3.45–3.52 (m, 4H),

3.58 (t,  $J = 6.0$  Hz, 1H), 3.62–3.68 (m, 1H), 3.76–3.79 (m, 1H), 4.02–4.09 (m, 1H),  
4.36 (q,  $J = 4.8$  Hz, 1H), 4.24–4.44 (m, 1H), 4.47–4.53 (m, 3H), 4.62–4.64 (m, 1H),  
4.68–4.79 (m, 4H), 4.81–4.85 (m, 2H), 4.91–4.99 (m, 3H), 5.20–5.24 (m, 2H), 7.15–  
7.39 (m, 35H).

$^{13}\text{C}$  NMR ( $\text{CDCl}_3$ , 100 MHz)  $\delta$  60.7, 67.3, 68.8, 68.9, 70.2, 71.2, 73.0, 74.5, 74.6,  
75.0, 75.0(5), 75.1(3), 75.8, 78.0, 78.3, 79.9, 81.1(6), 81.2(3), 81.4, 81.5, 82.0, 82.3,  
83.9, 84.0, 84.7, 95.2, 102.7, 104.1, 104.2, 127.6, 127.7, 127.7(8), 127.8(2), 127.9,  
128.0, 128.1, 128.2, 128.3, 128.4, 128.5(0), 128.5(4), 128.5(8), 128.6(0), 128.6(3),  
128.7, 128.8, 129.0, 135.3, 137.2, 137.6, 138.0, 138.2, 138.3, 138.3(6), 138.4(2),  
138.6, 139.0, 168.4, 168.6.

(2*S*,3*S*,4*R*,5*R*,6*R*)-4,5-Dihydroxy-3-methoxy-6-(((2*R*,3*S*,4*S*,5*R*)-3,4,5,6-tetrahydrox  
ytetrahydro-2*H*-pyran-2-yl)methoxy)tetrahydro-2*H*-pyran-2-carboxylic acid

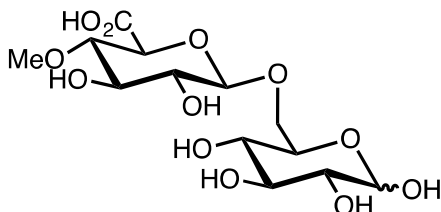

**G3** 4-Me-GlcA- $\beta$ (1,6)Glc

HRMS (ESI)  $m/z$  calcd for  $\text{C}_{13}\text{H}_{22}\text{O}_{12}\text{Na}$   $[\text{M}+\text{Na}]^+$ : 393.1003, found: 393.0994.

Benzyl(2*S*,3*S*,4*S*,5*R*,6*R*)-4,5-bis(benzyloxy)-3-methoxy-6-(((3*R*,4*S*,5*S*,6*R*)-2,3,5-tri  
s(benzyloxy)-6-((benzyloxy)methyl)tetrahydro-2*H*-pyran-4-yl)oxy)tetrahydro-2*H*-pyr  
an-2-carboxylate

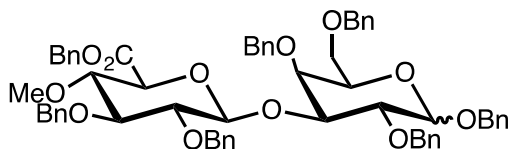

**G4'**

Glycosylation of **GD1**+**GA3** ( $\beta$ )

$^1\text{H}$  NMR ( $\text{CDCl}_3$ , 400 MHz)  $\delta$  3.28 (s, 3H), 3.41 (t,  $J = 9.6$  Hz, 1H), 3.47–3.60 (m,

624 5H), 3.67 (d,  $J$  = 10.0 Hz, 1H), 3.82–3.87 (m, 2H), 3.94 (t,  $J$  = 9.6 Hz, 1H), 4.36–  
 625 4.46 (m, 4H), 4.53–4.67 (m, 3H), 4.74–4.83 (m, 4H), 4.90 (t,  $J$  = 12.4 Hz, 2H), 4.99  
 626 (d,  $J$  = 11.2 Hz, 1H), 5.10–5.14 (m, 2H), 7.22–7.40 (m, 35H).  
 627  $^{13}\text{C}$  NMR ( $\text{CDCl}_3$ , 100 MHz)  $\delta$  60.4, 66.8, 68.7, 70.5, 71.0, 73.3, 73.4, 74.2, 74.5,  
 628 74.7, 75.5, 79.2, 80.5, 81.2, 82.0, 97.1, 103.2, 127.2, 127.6, 127.7(5), 127.8(0),  
 629 127.9(0), 127.9(2), 128.0, 128.1, 128.2, 128.3, 128.3(7), 128.4(3), 135.3, 137.4,  
 630 137.7, 138.0, 138.3(7), 138.4(3), 169.9.

631

632 (2*S*,3*S*,4*R*,5*R*,6*R*)-4,5-Dihydroxy-3-methoxy-6-(((3*R*,4*S*,5*S*,6*R*)-2,3,5-trihydroxy-6-(  
 633 hydroxymethyl)tetrahydro-2*H*-pyran-4-yl)oxy)tetrahydro-2*H*-pyran-2-carboxylic acid

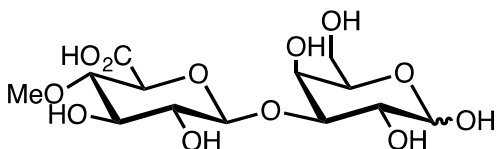

634

**G4** 4-Me-GlcA- $\beta$ (1,3)Gal

635 HRMS (ESI)  $m/z$  calcd for  $\text{C}_{13}\text{H}_{22}\text{O}_{12}\text{Na}$   $[\text{M}+\text{Na}]^+$ : 393.1003, found: 393.1001.

636

637 Benzyl(2*S*,3*S*,4*S*,5*R*,6*R*)-4,5-bis(benzyloxy)-3-methoxy-6-(((3*R*,4*S*,5*R*)-2,4,5-tris(b  
 638 enzyloxy)tetrahydro-2*H*-pyran-3-yl)oxy)tetrahydro-2*H*-pyran-2-carboxylate

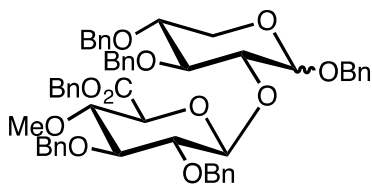

639

**G5'**

640 Glycosylation of **GD1**+**GA4** ( $\beta$ )

641  $^1\text{H}$  NMR ( $\text{CDCl}_3$ , 400 MHz)  $\delta$  3.35 (s, 3H), 3.39–3.54 (m, 3H), 3.59–3.64 (m, 2H),  
 642 3.67–3.73 (m, 1H), 3.79–3.81 (m, 1H), 3.94–4.05 (m, 1H), 4.53–4.58 (m, 2H), 4.60–  
 643 4.65 (m, 2H), 4.74–4.84 (m, 5H), 4.87–4.91 (m, 1H), 5.15–5.28 (m, 3H), 7.22–7.41  
 644 (m, 30H).

645  $^{13}\text{C}$  NMR ( $\text{CDCl}_3$ , 100 MHz)  $\delta$  60.5, 63.2, 67.1, 70.0, 72.9, 74.2, 74.9, 75.0, 75.5,

646 75.6, 77.9, 78.4, 81.1, 82.1, 83.4, 83.9, 101.4, 102.7, 127.4, 127.5, 127.6, 127.8(7),  
 647 127.9(1), 128.1(5), 128.2(2), 128.3, 128.4, 128.5, 128.6, 128.7, 137.7, 137.9, 138.3,  
 648 168.3.

649

650 (2*S*,3*S*,4*R*,5*R*,6*R*)-4,5-Dihydroxy-3-methoxy-6-(((3*R*,4*S*,5*R*)-2,4,5-trihydroxytetrahy  
 651 dro-2*H*-pyran-3-yl)oxy)tetrahydro-2*H*-pyran-2-carboxylic acid

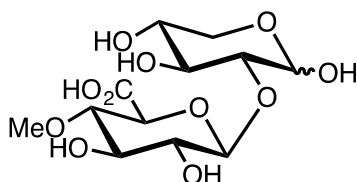

652 **G5** 4-Me-GlcA-β(1,2)Xyl

653 HRMS (ESI) *m/z* calcd for C<sub>12</sub>H<sub>20</sub>O<sub>11</sub>Na [M+Na]<sup>+</sup>: 363.0898, found: 363.0888.

654

655 Benzyl(2*S*,3*S*,4*S*,5*R*,6*R*)-3,4,5-tris(benzyloxy)-6-(((2*R*,3*S*,4*S*,5*R*)-3,4,5,6-tetrakis(b  
 656 enzyloxy)tetrahydro-2*H*-pyran-2-yl)methoxy)tetrahydro-2*H*-pyran-2-carboxylate

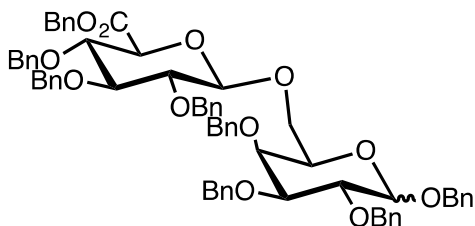

657 **G6'**

658 Glycosylation of **GD2**+**GA1** (β) C<sub>68</sub>H<sub>68</sub>O<sub>12</sub>

659 <sup>1</sup>H NMR (CDCl<sub>3</sub>, 400 MHz) δ 3.50 (t, *J* = 8.8 Hz, 1H), 3.61 (t, *J* = 8.8 Hz, 1H), 3.69  
 660 (dd, *J* = 8.4, 7.6 Hz, 1H), 3.79–3.88 (m, 3H), 3.98–4.04 (m, 2H), 4.11 (dd, *J* = 10.8,  
 661 2.4 Hz, 1H), 4.36 (t, *J* = 7.2 Hz, 1H), 4.42–4.48 (m, 4H), 4.53–4.59 (m, 3H), 4.66–  
 662 4.76 (m, 6H), 4.85–4.93 (m, 3H), 5.09 (s, 2H), 7.09–7.30 (m, 40H).

663 <sup>13</sup>C NMR (CDCl<sub>3</sub>, 100 MHz) δ 67.2, 68.6, 69.9, 72.2, 72.4, 73.1, 74.5, 74.8, 75.0,  
 664 75.7, 79.3, 80.1, 80.6, 81.6, 83.7, 84.0, 98.1, 104.0, 127.4, 127.6, 127.6(8), 127.7(4),  
 665 127.8, 128.0, 128.2, 128.3, 128.3(5), 128.3(9), 128.5, 135.0, 137.4(5), 137.5(3),  
 666 137.8, 138.1, 138.3, 138.4, 168.4.

667

668 (2*S*,3*S*,4*S*,5*R*,6*R*)-3,4,5-Trihydroxy-6-(((2*R*,3*R*,4*S*,5*R*)-3,4,5,6-tetrahydroxytetrahy  
669 dro-2*H*-pyran-2-yl)methoxy)tetrahydro-2*H*-pyran-2-carboxylic acid

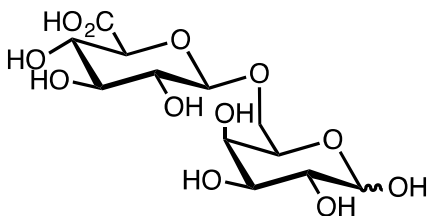

670

**G6** GlcA- $\beta$ (1,6)-Gal

671 HRMS (ESI)  $m/z$  calcd for  $C_{12}H_{20}O_{12}Na$   $[M+Na]^+$ : 379.0847, found: 379.0864.

672

673 Benzyl(2*S*,3*S*,4*S*,5*R*,6*R*)-3,4,5-tris(benzyloxy)-6-(((3*R*,4*S*,5*R*)-2,4,5-tris(benzyloxy)  
674 tetrahydro-2*H*-pyran-3-yl)oxy)tetrahydro-2*H*-pyran-2-carboxylate

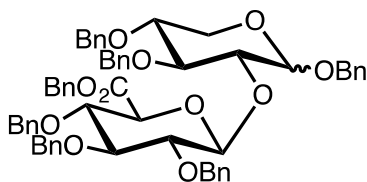

675

**G7'**

676 Glycosylation of **GD2**+**GA4** ( $\beta$ )

677  $^1H$  NMR ( $CDCl_3$ , 400 MHz)  $\delta$  3.18 (t,  $J$  = 10.0 Hz, 1H), 3.44 (dd,  $J$  = 10.0, 3.6 Hz,  
678 1H), 3.56–3.66 (m, 3H), 3.73 (t,  $J$  = 8.0 Hz, 1H), 3.86–3.91 (m, 2H), 4.30 (t,  $J$  = 11.6  
679 Hz, 2H), 4.39 (d,  $J$  = 11.6 Hz, 1H), 4.47–4.56 (m, 4H), 4.59–4.68 (m, 2H), 4.73–4.90  
680 (m, 5H), 4.98 (d,  $J$  = 2.4 Hz, 2H), 5.62 (d,  $J$  = 3.2 Hz, 1H), 6.95–7.30 (m, 35H).

681  $^{13}C$  NMR ( $CDCl_3$ , 100 MHz)  $\delta$  63.8, 66.8, 70.3, 70.7, 71.9, 73.2, 74.8, 75.2, 75.3,  
682 75.7, 78.4, 78.9, 79.9, 80.8, 81.2, 95.4, 103.3, 127.2, 127.4, 127.5, 127.6, 127.7,  
683 127.9, 128.0, 128.1, 128.2, 128.3, 128.3(5), 128.4(4), 128.7, 135.3, 137.1, 137.6,  
684 137.9, 138.3, 138.5, 170.2.

685

686 (2*S*,3*S*,4*S*,5*R*,6*R*)-3,4,5-Trihydroxy-6-(((3*R*,4*S*,5*R*)-2,4,5-trihydroxytetrahydro-2*H*-p  
687 yran-3-yl)oxy)tetrahydro-2*H*-pyran-2-carboxylic acid

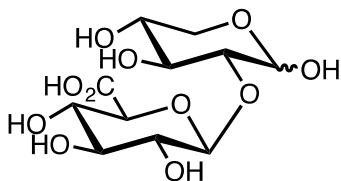

**G7** GlcA- $\beta$ (1,2)-Xyl

HRMS (ESI)  $m/z$  calcd for  $C_{11}H_{18}O_{11}Na$   $[M+Na]^+$ : 349.0741, found: 349.0734.

(3*R*,4*S*,5*S*,6*R*)-2,3,4,5-Tetrakis(benzyloxy)-6-((((2*R*,3*R*,4*S*,5*R*,6*R*)-3,4-bis(benzyloxy)-6-((benzyloxy)methyl)-5-methoxytetrahydro-2*H*-pyran-2-yl)oxy)methyl)tetrahydro-2*H*-pyran

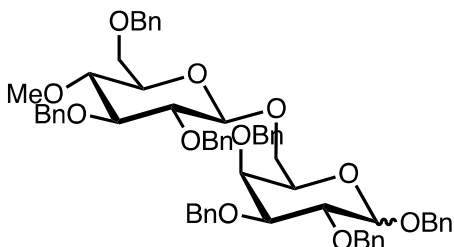

**G8'**

Glycosylation of **GD3+GA1** ( $\beta$ )

$^1H$  NMR ( $CDCl_3$ , 400 MHz)  $\delta$  3.32 (d,  $J$  = 6.0 Hz, 2H), 3.42–3.52 (m, 5H), 3.68–3.71 (m, 1H), 3.80–3.89 (m, 2H), 4.01–4.07 (m, 3H), 4.15 (dd,  $J$  = 7.2, 3.2 Hz, 1H), 4.29 (d,  $J$  = 12.0 Hz, 1H), 4.38–4.43 (m, 2H), 4.46–4.53 (m, 4H), 4.58–4.65 (m, 2H), 4.67–4.78 (m, 4H), 4.86–4.94 (m, 3H), 5.14 (s, 1H), 7.20–7.35 (m, 35H).

$^{13}C$  NMR ( $CDCl_3$ , 100 MHz)  $\delta$  60.5, 68.4, 69.0, 70.3, 71.8, 72.0, 73.0, 73.3, 73.6, 75.4, 75.7, 79.2, 79.7, 80.7, 81.3, 81.8, 82.7, 88.3, 97.7, 105.0, 127.4(7), 127.5(2), 127.5(9), 127.6(3), 127.6(6), 127.7(4), 127.7(9), 127.8(4), 127.8(7), 127.9(3), 128.0, 128.2, 128.2(6), 128.3(2), 128.3(4), 128.4, 137.6, 137.7, 137.8, 138.0, 138.1.

(3*R*,4*S*,5*R*,6*R*)-6-((((2*R*,3*R*,4*R*,5*S*,6*R*)-3,4-Dihydroxy-6-(hydroxymethyl)-5-methoxy tetrahydro-2*H*-pyran-2-yl)oxy)methyl)tetrahydro-2*H*-pyran-2,3,4,5-tetraol

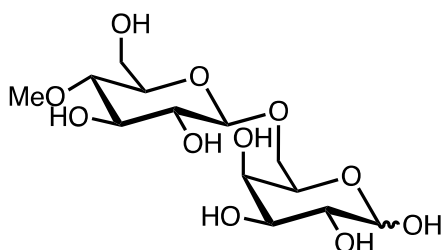

**G8** GlcA- $\beta$ (1,6)-Gal

HRMS (ESI)  $m/z$  calcd for  $C_{13}H_{24}O_{11}Na$   $[M+Na]^+$ : 379.1211, found: 379.1205.

Benzyl(2*S*,3*S*,4*S*,5*R*,6*R*)-4,5-bis(benzyloxy)-3-methoxy-6-((tetrahydro-2*H*-pyran-2-yl)methoxy)tetrahydro-2*H*-pyran-2-carboxylate

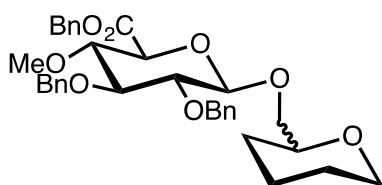

**G10'**

Glycosylation of **GD1+ROH** (tetrahydropyran-2-methanol) ( $\beta$ )

$^1H$  NMR ( $CDCl_3$ , 400 MHz)  $\delta$  1.49–1.84 (m, 6H), 3.35 (s, 3H), 3.59–3.43(m, 5H), 3.79–3.91 (m, 2H), 3.97–4.00 (m, 1H), 4.46 (dd,  $J$  = 13.2, 7.6 Hz, 1H), 4.66–4.76 (m, 2H), 4.85 (dd,  $J$  = 10.8, 2.0 Hz, 1H), 4.96 (dd,  $J$  = 10.8, 4.0 Hz, 1H), 5.20–5.30 (m, 3H), 7.29–7.40 (m, 15H).

$^{13}C$  NMR ( $CDCl_3$ , 100 MHz)  $\delta$  23.21, 25.9, 28.1, 28.3, 60.6, 67.2, 68.2, 68.4, 73.4, 73.7, 74.4, 74.6, 74.8, 75.6, 76.2, 81.0, 81.3(8), 81.4(4), 83.7, 103.9, 104.4, 127.6, 127.9, 128.2, 128.3, 128.4, 128.5, 128.6, 129.0, 135.2, 138.4, 168.4, 168.5.

(2*S*,3*S*,4*R*,5*R*,6*R*)-4,5-Dihydroxy-3-methoxy-6-((tetrahydro-2*H*-pyran-2-yl)methoxy)tetrahydro-2*H*-pyran-2-carboxylic acid

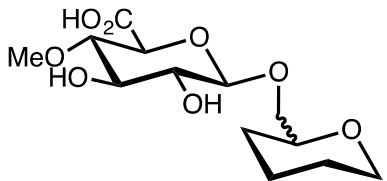

**G10** 4-Me-GlcA-β-Pyran

HRMS (ESI)  $m/z$  calcd for  $C_{13}H_{22}O_8Na$   $[M+Na]^+$ : 329.1207, found: 329.1198.

**Preparation of G9** (Fig. S7)

To a stirred solution of the **G1** (1.5 mg) in 3 mL of toluene/MeOH (1:2), TMSCHN<sub>2</sub> (1.1–1.5 mmol) was added dropwise until yellow color persisted. The mixture was stirred for 30 min at RT and concentrated to give the corresponding methyl ester **G9** as white solid (1.6 mg, 95% yield).

Methyl(2*S*,3*S*,4*R*,5*R*,6*R*)-4,5-dihydroxy-3-methoxy-6-(((2*R*,3*R*,4*S*,5*R*)-3,4,5,6-tetrahydroxytetrahydro-2*H*-pyran-2-yl)methoxy)tetrahydro-2*H*-pyran-2-carboxylate

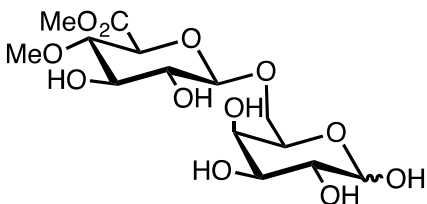

**G9**

HRMS (ESI)  $m/z$  calcd for  $C_{14}H_{24}O_{12}Na$   $[M+Na]^+$ : 407.1165, found: 407.1173.

**Preparation of G11** (Fig. S8)

(2*R*,4*aR*,6*R*,7*R*,8*R*,8*aS*)-6-Methoxy-2-phenylhexahydropyrano[3,2-*d*][1,3]dioxine-7,8-diol

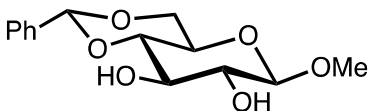

**2-OMe**

A mixture of commercially purchased 1-OMe-Glc ( $\beta$ ) (776 mg, 4.0 mmol), benzaldehyde dimethyl acetal (1.8 mL, 12.0 mmol), and TsOH $\cdot$ H<sub>2</sub>O (189 mg, 1.0 mmol, 0.25 equiv.) was heated at 50 °C for 3 h. The solution was neutralized with NaHCO<sub>3</sub>, filtration and wash with MeOH. The filtrate was concentrated *in vacuo* and the residue was purified by flash column chromatography (EtOAc) and recrystallized from EtOAc/hexane (1:2) afforded an analytical sample of acetal **2-OMe** as a white solid (761 mg, 2.7 mmol, 68% yield).

<sup>1</sup>H NMR (CDCl<sub>3</sub>, 400 MHz)  $\delta$  2.56 (s, 1H), 2.70 (s, 1H), 3.45–3.57 (m, 3H), 3.59 (s, 3H), 3.77–3.86 (m, 2H), 4.33–4.39 (m, 2H), 5.55 (s, 1H), 7.37–7.41 (m, 3H), 7.49–7.51 (m, 2H).

<sup>13</sup>C NMR (CDCl<sub>3</sub>, 100 MHz)  $\delta$  57.5, 66.4, 68.7, 73.2, 74.5, 80.6, 101.9, 104.1, 126.3, 128.4, 129.3.

(2*R*,3*R*,4*S*,5*R*,6*R*)-4,5-Bis(benzyloxy)-2-(hydroxymethyl)-6-methoxytetrahydro-2*H*-pyran-3-ol

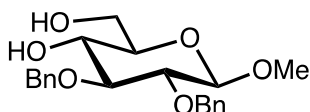

**3-OMe**

To a stirred suspension of acetal **2-OMe** (676 mg, 2.4 mmol) in dry DMF (12 mL) was added NaH 60% in mineral oil (240 mg, 6.0 mmol, 2.5 equiv.) in 2 portions at 0 °C, and stirred for 1 h, followed by treated with benzyl bromide (BnBr: 720  $\mu$ L, 6.0 mmol), stirred for 8 h at room temperature, and MeOH (1.0 equiv.) was added slowly until no gas was formed to quench the reaction. After extracted with EtOAc/H<sub>2</sub>O = 1:1 (2 times), organic layer was concentrated *in vacuo* to remove solvents to give a crude oil mixture. To the CH<sub>2</sub>Cl<sub>2</sub>/MeOH solution of the yielded oil mixture was added TsOH $\cdot$ H<sub>2</sub>O (10 mol%), and then the mixture was stirred at room temperature for overnight. The solution was neutralized with NaHCO<sub>3</sub>, and organic solvent was concentrated *in vacuo* to afford a crude viscous liquid. Column chromatography (hexane/EtOAc = 1:1) yielded dibenzyl **3-OMe** as a white solid

770 (664 mg, 1.8 mmol, 74% yield).

771  $^1\text{H}$  NMR ( $\text{CDCl}_3$ , 400 MHz)  $\delta$  2.03 (t,  $J$  = 6.0 Hz, 1H), 2.70 (d,  $J$  = 2.4 Hz, 1H), 3.32–  
772 3.37 (m, 1H), 3.39–3.47 (m, 2H), 3.54 (dd,  $J$  = 9.2, 2.0 Hz, 1H), 3.74–3.80 (m, 1H),  
773 3.87–3.92 (m, 1H), 4.37 (d,  $J$  = 7.6 Hz, 1H), 4.69 (dd,  $J$  = 14.4, 11.2 Hz, 2H), 4.95  
774 (dd,  $J$  = 17.6, 12.8 Hz, 2H), 7.29–7.39 (m, 10H).

775  $^{13}\text{C}$  NMR ( $\text{CDCl}_3$ , 100 MHz)  $\delta$  57.3, 62.5, 70.3, 74.6, 74.8, 75.2, 81.9, 83.8, 104.9,  
776 127.7, 127.9, 128.1, 128.4, 128.6, 138.3, 138.4.

777

778 (2*R*,3*R*,4*S*,5*R*,6*R*)-4,5-Bis(benzyloxy)-6-methoxy-2-((trityloxy)methyl)tetrahydro-2*H*  
779 -pyran-3-ol

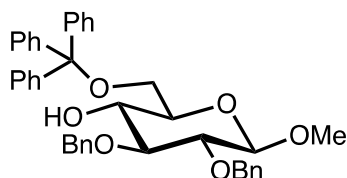

4-OMe

780

781 Triphenylmethyl chloride (1.1 g, 4.0 mmol, 2.5 equiv.) and  
782 *N,N*-dimethyl-4-aminopyridine (DMAP: 20.0 mg, 0.16 mmol) were added to a stirred  
783 solution of dibenzyl **3-OMe** (600 mg, 1.6 mmol) in dry pyridine (10 mL) and the  
784 reaction mixture heated at 60 °C for overnight. The reaction mixture was quenched  
785 with MeOH (5 mL) and concentrated *in vacuo*. The resulting syrup was purified by  
786 short column chromatography (hexane/EtOAc = 1:1) to give the trityl ether **4-OMe**  
787 (523 mg, 0.85 mmol, 53% yield) as a viscous oil liquid.

788  $^1\text{H}$  NMR ( $\text{CDCl}_3$ , 400 MHz)  $\delta$  2.46 (s, 1H), 3.35–3.47 (m, 5H), 3.60–3.66 (m, 4H),  
789 4.34 (d,  $J$  = 7.6 Hz, 1H), 4.73 (t,  $J$  = 10.8 Hz, 2H), 4.92 (t,  $J$  = 10.8 Hz, 2H), 7.20–  
790 7.38 (m, 20H), 7.42–7.48 (m, 5H).

791  $^{13}\text{C}$  NMR ( $\text{CDCl}_3$ , 100 MHz)  $\delta$  56.8, 64.0, 71.7, 73.9, 74.7, 75.4, 81.9, 84.1, 86.8,  
792 104.6, 127.0, 127.6, 127.7(6), 127.8(3), 127.9(6), 128.0(4), 128.3, 128.5, 128.6,  
793 138.5, 138.6, 143.7.

794

795 ((2*R*,3*R*,4*S*,5*R*,6*R*)-4,5-Bis(benzyloxy)-3,6-dimethoxytetrahydro-2*H*-pyran-2-yl)met  
796 hanol

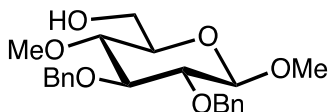

797 **5-OMe**

798 To a stirred solution of trityl ether **4-OMe** (493 mg, 0.8 mmol) in DMF (8 mL) was  
799 added 60% NaH dispersion in mineral oil (48.0 mg, 1.2 mmol, 1.5 equiv.) at 0 °C,  
800 after 30 min, iodomethane (MeI: 75  $\mu$ L, 1.2 mmol) was added and the reaction  
801 mixture was stirred for another 3 h at room temperature before 1.0 equiv. MeOH  
802 was added to stop the reaction. The reaction mixture was extracted with  
803 H<sub>2</sub>O/EtOAc/hexane = 2:1:1 (10 mL) for 2 times to remove DMF, dried over Na<sub>2</sub>SO<sub>4</sub>.  
804 After filtration, the mixture was concentrated *in vacuo*. The yielded crude product  
805 was dissolved in MeOH/CH<sub>2</sub>Cl<sub>2</sub> (30 mL) to afford a yellow solution which was  
806 treated with TsOH·H<sub>2</sub>O (10 mol%) and stirred at RT, after 6 h, NaHCO<sub>3</sub> was added  
807 to neutralize the reaction. The yellow solution was concentrated *in vacuo*, followed  
808 by a flash column chromatography (hexane/EtOAc = 3:1) to yield alcohol **5-OMe** as  
809 a white solid (168 mg, 0.43 mmol, 54%).

810 <sup>1</sup>H NMR (CDCl<sub>3</sub>, 400 MHz)  $\delta$  2.03 (t, *J* = 6.4 Hz, 1H), 3.28–3.31 (m, 2H), 3.35 (t, *J* =  
811 8.4 Hz, 1H), 3.56 (s, 3H), 3.57 (s, 3H), 2.03 (t, *J* = 6.4 Hz, 1H), 3.74 (dd, *J* = 9.2, 7.2  
812 Hz, 1H), 3.90 (dd, *J* = 12.0, 3.6 Hz, 1H), 4.34 (d, *J* = 8.0 Hz, 1H), 4.70 (d, *J* = 11.2  
813 Hz, 1H), 4.79 (d, *J* = 11.2 Hz, 1H), 4.89 (d, *J* = 11.2 Hz, 2H), 7.27–7.35 (m, 10H).

814 <sup>13</sup>C NMR (CDCl<sub>3</sub>, 100 MHz)  $\delta$  57.2, 60.8, 61.9, 74.8, 75.0, 75.5, 79.5, 82.1, 84.2,  
815 104.7, 127.6, 127.9, 128.0, 128.3, 138.4, 138.5

816

817 (2*S*,3*S*,4*S*,5*R*,6*R*)-4,5-Bis(benzyloxy)-3,6-dimethoxytetrahydro-2*H*-pyran-2-carbox  
818 ylic acid

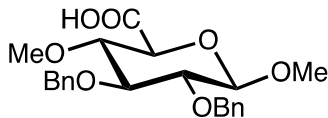

**6-OMe**

To a 10 mL CH<sub>2</sub>Cl<sub>2</sub> solution of alcohol **5-OMe** (116 mg, 0.30 mmol) and buffer (Na<sub>2</sub>HPO<sub>4</sub>/NaH<sub>2</sub>PO<sub>4</sub>, PH=7) was added iodobenzene diacetate (193 mg, 0.60 mmol, 2.0 equiv.) at 0 °C, followed by addition of 2-azaadamantane *N*-oxyl (AZADO, 4.0 mg, 0.03 mmol, 0.1 equiv.). The mixture was stirred at the same temperature. The reaction was monitored by TLC, after 2 h, **5-OMe** was consumed, the reaction mixture was extracted by CH<sub>2</sub>Cl<sub>2</sub> and water for 3 times, the organic layer was dried over Na<sub>2</sub>SO<sub>4</sub>, solvent was removed in *vacuo* and the residue was purified by a silica gel column chromatography (hexane/EtOAc = 5:1) to yield benzyl ether **6-OMe** as an amorphous solid (64.3 mg, 0.16 mmol, 53% yield).

<sup>1</sup>H NMR (CDCl<sub>3</sub>, 400 MHz) δ 3.38–3.56 (m, 9H), 3.75 (s, 1H), 4.30 (d, *J* = 5.6 Hz, 1H), 4.57 (d, *J* = 11.2 Hz, 1H), 4.75–4.80 (m, 4H), 7.22–7.23 (m, 10H).

<sup>13</sup>C NMR (CDCl<sub>3</sub>, 100 MHz) δ 57.8, 60.4, 74.6, 75.4, 81.8, 82.2, 83.6, 104.5, 127.4, 127.7, 128.2, 138.4, 138.5, 174.2.

(2*S*,3*S*,4*R*,5*R*,6*R*)-4,5-Dihydroxy-3,6-dimethoxytetrahydro-2*H*-pyran-2-carboxylic acid

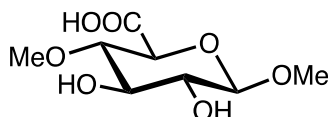

**G11**

A 20 mL Schlenk tube was charged with **6-OMe** (40.2 mg, 0.10 mmol) in MeOH/EtOAc = 1:1 solution (5 mL) under N<sub>2</sub>, then added pre-activated (water-removed) Pd(OH)<sub>2</sub>/C 20.0 mg, H<sub>2</sub> gas was later charged and replace the N<sub>2</sub> by air pump vacuum/H<sub>2</sub> exchange, the reaction mixture was stirred at room temperature for overnight, the completion of the reaction was monitored by LC-MS. The mixture was subjected to filtration by passing through a packed Celite® cake,

to remove Pd(OH)<sub>2</sub>/C, the residue was obtained after removing the solvent *in vacuo*, followed by reverse phase TLC (MeOH), afford the corresponding product **G11** as an off-white solid (22.2 mg, 0.10 mmol, quant.).

<sup>1</sup>H NMR (CD<sub>3</sub>OD, 400 MHz) δ 3.13–3.21 (m, 1H), 3.24–3.25 (m, 2H), 3.40 (t, *J* = 9.2 Hz, 1H), 3.44 (s, 3H), 3.45 (s, 3H), 3.69 (d, *J* = 10.0 Hz, 1H), 4.14 (d, *J* = 8.0 Hz, 1H).

<sup>13</sup>C NMR (CD<sub>3</sub>OD 100 MHz) δ 57.6, 60.8, 74.8, 75.8, 77.3, 83.0, 105.5 (carbon signal of C=O is missing for its low concentration in CD<sub>3</sub>OD).

<sup>13</sup>C NMR (D<sub>2</sub>O 100 MHz) δ 57.6 (the standard peak based on that observed in CD<sub>3</sub>OD), 60.3, 72.9, 73.9, 75.1, 81.7, 103.4, 171.4.

HRMS (ESI) *m/z* calcd for C<sub>8</sub>H<sub>14</sub>O<sub>7</sub>Na [M+Na]<sup>+</sup>: 245.0632 found: 245.0628.

## References:

- S1. A.G. Mizukami, R. Inatsugi, J. Jiao *et al. Curr. Bio.*, **2016**, 26, 321–323;
- S2. Ewing, David F. *et al. Carbohydrate Lett.*, **1997**, 2, 273–280;
- S3. a) J. Xia, J. L. Alderfer, *et al. Chem. Eur. J.*, **2001**, 7, 356–367; b) S. Manner, U. Ellervik, *Synlett*, **2014**, 25, 1271–1274;
- S4. M. Numata, M. Sugimoto, K. Koike, T. Ogawa, *Carbohydrate Res.*, **1987**, 163, 209–225;
- S5. U. S. Chowdhury, *Syn. Commun.*, **2000**, 30, 3785–3792;
- S6. P. Cmoch, Z. Pakulski *et al. Tetrahedron: Asymmetry*, **2008**, 19, 1494–1503

873

## Biology

874

**Table S2.** AMOR activity results for synthetic AMOR and derivatives.

875

| Compound                                    | Concentration<br>( $\mu$ M) | Responsive Pollen Tubes<br>(%) | S.D. | S.E.  | P value (Scheffé test)<br>Comparison with<br>4-Me-GlcA- $\beta$ (1,6)-Gal<br>(G1) |
|---------------------------------------------|-----------------------------|--------------------------------|------|-------|-----------------------------------------------------------------------------------|
| 4-Me-GlcA- $\beta$ (1,6)-Gal<br><b>G1</b>   | 1.35                        | 80.0                           | 10.0 | 5.780 |                                                                                   |
| 4-Me-GlcA- $\alpha$ (1,6)-Gal<br><b>G2</b>  | 1.35                        | 33.3                           | 5.68 | 3.286 | 0.0054475 (**P<0.01)                                                              |
| 4-Me-GlcA- $\beta$ (1,6)-Glc<br><b>G3</b>   | 1.35                        | 56.7                           | 15.2 | 8.829 | 0.4897411 (insignificant)                                                         |
| 4-Me-GlcA- $\beta$ (1,3)-Gal<br><b>G4</b>   | 1.35                        | 40.0                           | 10.0 | 5.78  | 0.0241134 (*P<0.05)                                                               |
| 4-Me-GlcA- $\beta$ (1,2)-Xyl<br><b>G5</b>   | 1.35                        | 26.7                           | 11.5 | 6.674 | 0.0011994 (**P<0.01)                                                              |
| GlcA- $\beta$ (1,6)-Gal<br><b>G6</b>        | 1.35                        | 3.3                            | 5.8  | 3.337 | 7.87E-06 (**P<0.01)                                                               |
| GlcA- $\beta$ (1,2)-Xyl<br><b>G7</b>        | 1.35                        | 6.7                            | 5.8  | 3.337 | 6.28E-05 (**P<0.01)                                                               |
| 4-Me-Glc- $\beta$ (1,6)-Gal<br><b>G8</b>    | 1.35                        | 13.33                          | 11.5 | 6.674 | 4.05E-06 (**P<0.01)                                                               |
| 4,6-Me-GlcA- $\beta$ (1,6)-Gal<br><b>G9</b> | 1.35                        | 0                              | 0    | 0     | 0 (**P<0.01)                                                                      |
| 4-Me-GlcA- $\beta$ (1,6)-Pryn<br><b>G10</b> | 1.35                        | 83.3                           | 11.5 | 6.674 | 0.9999993 (insignificant)                                                         |
| 4-Me-GlcA-O-Me<br><b>G11</b>                | 1.35                        | 23.3                           | 5.8  | 3.337 | 0.0005656 (**P<0.01)                                                              |

876
